# Supplementary material
Source: Research Square preprint supplement (doi:10.21203/rs.3.rs-9223330/v1)
Supplement: Supplementary file 1 [file 019cb3c7dfcc6030634ea481.xlsx]

## Sheet: age
year	month	F0014	15~19	20~24	25~29	30~34	35~39	40~44	45~49	50~54	55~59	F1559	60~64	65~69	70+	F6070	FF	M0014	15~19	20~24	25~29	30~34	35~39	40~44	45~49	50~54	55~59	M1559	60~64	65~69	70+	M6070	MM	TT
2005	1	7	19	22	26	26	27	24	23	25	25	217	29	30	148	207	431	7	11	24	23	26	32	51	52	51	51	321	79	100	354	533	861	1292
2005	2	2	7	19	14	14	11	13	20	26	15	139	15	28	130	173	314	5	14	25	16	29	30	46	38	52	45	295	54	74	336	464	764	1078
2005	3	5	16	25	24	27	21	16	28	31	23	211	28	35	184	247	463	6	9	24	40	35	44	61	66	77	71	427	80	93	399	572	1005	1468
2005	4	6	11	22	24	15	22	24	26	22	20	186	26	38	149	213	405	2	17	26	20	24	39	57	67	63	68	381	79	92	442	613	996	1401
2005	5	8	11	27	41	27	16	43	30	27	23	245	20	28	173	221	474	9	19	27	25	27	50	66	73	99	81	467	90	69	455	614	1090	1564
2005	6	7	18	28	23	23	26	29	25	22	22	216	31	34	151	216	439	5	22	18	29	27	35	53	67	82	56	389	86	96	422	604	998	1437
2005	7	6	11	27	32	22	22	25	20	28	27	214	19	42	150	211	431	5	22	21	23	26	53	50	59	53	58	365	77	102	391	570	940	1371
2005	8	3	13	27	34	19	11	29	17	25	20	195	27	32	178	237	435	6	20	33	29	45	41	61	69	76	60	434	67	85	466	618	1058	1493
2005	9	9	10	26	32	23	18	17	33	29	19	207	21	29	175	225	441	3	19	40	33	34	23	43	52	87	53	384	55	101	394	550	937	1378
2005	10	6	16	36	36	20	15	18	25	17	22	205	19	37	154	210	421	7	28	26	23	36	42	45	58	61	56	375	52	77	433	562	944	1365
2005	11	9	19	21	27	19	19	19	25	24	30	203	16	35	169	220	432	7	11	22	25	31	33	34	69	77	50	352	75	85	412	572	931	1363
2005	12	5	16	29	21	18	16	21	22	27	20	190	18	29	141	188	383	4	21	15	27	36	36	42	49	62	45	333	50	73	419	542	879	1262
2006	1	7	16	16	25	21	15	19	20	24	19	175	22	28	117	167	349	5	20	25	18	22	27	45	54	60	43	314	59	81	339	479	798	1147
2006	2	3	7	21	20	16	12	15	18	31	18	158	17	24	130	171	332	4	12	21	25	24	26	49	56	70	54	337	48	80	313	441	782	1114
2006	3	5	14	25	33	20	22	28	24	33	28	227	20	38	134	192	424	8	17	35	32	35	37	56	74	67	68	421	66	77	400	543	972	1396
2006	4	4	10	17	24	20	15	23	21	19	39	188	22	26	154	202	394	6	11	30	19	23	45	52	53	63	60	356	55	80	397	532	894	1288
2006	5	7	26	25	14	16	25	26	36	23	35	226	22	35	195	252	485	9	13	24	24	28	33	68	69	78	71	408	74	96	510	680	1097	1582
2006	6	5	12	15	23	10	24	20	26	39	27	196	28	37	209	274	475	10	23	26	26	31	40	48	64	65	76	399	57	96	422	575	984	1459
2006	7	3	12	21	23	17	24	22	22	23	24	188	25	29	136	190	381	7	15	22	22	24	37	48	66	62	63	359	58	70	404	532	898	1279
2006	8	9	12	24	19	20	21	23	24	32	25	200	18	30	161	209	418	6	15	22	23	29	35	60	58	69	68	379	55	82	386	523	908	1326
2006	9	7	16	19	22	21	24	19	13	24	26	184	21	42	148	211	402	4	17	17	24	23	36	47	47	71	65	347	65	80	369	514	865	1267
2006	10	6	22	19	23	21	21	17	21	29	21	194	20	37	133	190	390	4	26	27	22	27	29	38	49	59	53	330	47	66	372	485	819	1209
2006	11	7	15	33	15	18	18	22	22	15	15	173	13	22	163	198	378	2	21	21	20	22	30	51	52	63	56	336	39	71	373	483	821	1199
2006	12	6	18	18	21	25	14	15	15	31	21	178	11	29	122	162	346	3	16	19	21	31	24	32	50	70	44	307	58	56	342	456	766	1112
2007	1	3	7	20	26	22	13	28	22	24	22	184	12	21	136	169	356	4	19	12	20	17	25	38	65	65	74	335	48	63	396	507	846	1202
2007	2	3	9	13	21	14	7	22	14	20	18	138	9	24	109	142	283	7	8	20	12	12	22	35	40	46	31	226	36	44	300	380	613	896
2007	3	5	12	21	17	15	19	14	20	24	24	166	15	32	135	182	353	4	15	14	31	30	37	33	66	74	84	384	66	87	377	530	918	1271
2007	4	7	11	23	22	24	15	19	23	17	18	172	26	26	120	172	351	5	18	24	16	26	35	43	41	52	54	309	69	62	387	518	832	1183
2007	5	11	12	21	14	24	16	22	32	32	23	196	29	34	176	239	446	4	19	27	26	29	39	44	55	73	60	372	57	92	420	569	945	1391
2007	6	5	8	17	21	23	15	30	25	24	31	194	15	23	133	171	370	4	14	19	27	21	33	42	64	49	65	334	53	77	343	473	811	1181
2007	7	8	5	22	20	25	18	21	28	31	25	195	11	30	153	194	397	4	10	19	27	17	31	45	62	56	85	352	68	58	403	529	885	1282
2007	8	2	15	13	17	25	16	26	15	32	27	186	19	21	149	189	377	7	12	17	20	23	29	45	58	58	76	338	57	67	402	526	871	1248
2007	9	5	20	16	16	20	13	18	15	16	27	161	14	19	129	162	328	5	12	25	26	16	26	37	46	45	49	282	53	85	366	504	791	1119
2007	10	8	22	24	21	21	31	15	18	21	26	199	23	13	181	217	424	4	26	24	30	27	27	40	50	61	75	360	49	65	419	533	897	1321
2007	11	9	17	25	20	24	23	24	21	33	16	203	24	28	154	206	418	4	22	22	23	16	27	48	41	50	63	312	53	75	353	481	797	1215
2007	12	4	17	19	19	20	22	24	26	29	23	199	16	25	153	194	397	5	16	17	22	19	30	42	59	51	61	317	38	59	355	452	774	1171
2008	1	1	7	13	29	25	25	18	19	31	17	184	16	32	135	183	368	6	12	16	30	26	35	50	38	56	62	325	38	66	353	457	788	1156
2008	2	3	9	23	16	11	6	13	14	23	19	134	14	25	129	168	305	7	14	19	18	12	24	29	36	37	52	241	41	64	294	399	647	952
2008	3	9	8	22	14	24	20	14	22	18	23	165	17	19	148	184	358	4	18	16	26	20	42	43	47	71	50	333	50	71	346	467	804	1162
2008	4	5	12	17	20	21	18	18	15	22	30	173	18	41	140	199	377	6	28	24	34	25	38	36	56	58	75	374	66	73	410	549	929	1306
2008	5	3	6	22	26	23	18	18	25	27	27	192	20	19	185	224	419	6	16	24	21	33	32	50	59	61	82	378	51	76	427	554	938	1357
2008	6	5	10	20	18	20	27	17	29	26	29	196	17	42	144	203	404	4	20	19	22	21	32	37	44	49	73	317	65	69	332	466	787	1191
2008	7	2	8	27	19	17	15	26	21	24	22	179	19	38	152	209	390	6	14	26	29	24	25	46	55	56	46	321	43	78	401	522	849	1239
2008	8	8	7	15	25	19	13	20	21	23	25	168	21	33	149	203	379	6	8	17	25	21	24	43	55	69	67	329	49	67	357	473	808	1187
2008	9	1	16	25	29	12	12	26	25	27	16	188	18	27	126	171	360	3	20	14	23	30	31	40	41	60	48	307	62	74	396	532	842	1202
2008	10	9	16	30	21	23	27	21	23	25	16	202	23	28	133	184	395	9	26	20	31	23	38	40	57	51	59	345	66	81	395	542	896	1291
2008	11	4	12	12	19	18	10	15	19	21	20	146	14	26	145	185	335	7	11	22	17	19	26	44	50	51	56	296	34	62	334	430	733	1068
2008	12	4	4	16	21	16	10	14	21	19	29	150	17	28	141	186	340	4	7	17	27	14	27	39	51	66	58	306	55	75	374	504	814	1154
2009	1	3	7	11	20	12	13	16	10	18	18	125	14	14	107	135	263	3	10	13	19	20	25	25	47	37	42	238	44	68	300	412	653	916
2009	2	3	6	14	16	17	13	17	10	21	26	140	14	26	143	183	326	1	16	16	22	16	27	39	44	54	53	287	42	64	345	451	739	1065
2009	3	2	11	14	17	21	22	23	23	24	19	174	22	22	160	204	380	2	17	18	15	23	16	28	48	54	58	277	56	80	350	486	765	1145
2009	4	7	11	15	19	14	14	14	14	15	31	147	19	34	130	183	337	8	19	21	17	24	38	37	60	56	63	335	62	73	362	497	840	1177
2009	5	2	9	14	21	9	18	12	17	25	29	154	21	24	133	178	334	4	11	12	17	32	29	27	49	47	56	280	51	74	366	491	775	1109
2009	6	7	13	9	27	16	25	16	21	29	30	186	14	24	134	172	365	4	26	17	27	16	27	37	51	62	90	353	48	69	392	509	866	1231
2009	7	3	9	17	21	18	17	18	13	27	22	162	16	14	142	172	337	6	23	20	21	25	27	33	59	47	60	315	56	67	363	486	807	1144
2009	8	4	5	16	15	18	10	14	17	20	20	135	19	17	133	169	308	8	15	15	20	14	24	36	48	59	42	273	43	71	364	478	759	1067
2009	9	2	17	16	19	19	19	17	23	27	24	181	24	23	114	161	344	6	17	14	17	27	28	40	44	59	63	309	37	53	356	446	761	1105
2009	10	7	27	22	18	15	11	12	20	19	33	177	12	24	166	202	386	7	30	14	16	18	24	29	44	61	63	299	52	72	378	502	808	1194
2009	11	6	16	10	12	13	14	18	19	25	26	153	13	22	139	174	333	1	14	18	14	13	23	28	49	54	48	261	50	53	335	438	700	1033
2009	12	9	11	12	15	18	15	16	17	22	26	152	22	30	149	201	362	6	21	10	22	22	21	41	55	61	61	314	50	52	366	468	788	1150
2010	1	4	8	12	23	14	11	17	13	19	28	145	25	14	125	164	313	3	16	14	15	20	18	28	43	67	50	271	41	59	340	440	714	1027
2010	2	6	9	10	12	17	21	10	13	12	19	123	16	21	142	179	308	5	13	11	11	13	16	34	43	45	42	228	41	51	280	372	605	913
2010	3	8	12	20	21	14	9	16	14	26	31	163	29	28	147	204	375	8	9	20	18	24	14	32	49	60	58	284	63	63	351	477	769	1144
2010	4	4	7	18	16	24	19	23	15	24	27	173	12	16	137	165	342	3	16	19	25	25	27	32	44	69	68	325	53	69	335	457	785	1127
2010	5	4	7	19	31	22	13	19	11	14	25	161	22	21	145	188	353	1	17	28	22	15	28	45	57	55	84	351	69	61	358	488	840	1193
2010	6	5	9	17	27	17	18	15	14	19	29	165	23	20	151	194	364	3	10	18	21	23	19	44	39	53	58	285	43	77	394	514	802	1166
2010	7	4	10	21	22	22	10	17	17	18	32	169	17	16	161	194	367	3	6	13	12	25	15	28	54	63	61	277	70	56	369	495	775	1142
2010	8	3	9	20	18	21	10	25	19	24	17	163	16	18	144	178	344	3	15	8	24	12	18	32	42	56	63	270	51	73	393	517	790	1134
2010	9	4	15	15	12	12	15	12	22	21	17	141	19	18	155	192	337	3	21	13	20	23	21	31	40	51	60	280	61	68	369	498	781	1118
2010	10	4	18	9	12	10	15	21	25	21	23	154	16	22	127	165	323	5	24	18	20	19	30	38	42	69	42	302	36	48	386	470	777	1100
2010	11	1	17	15	23	13	16	14	16	22	29	165	27	17	160	204	370	4	14	9	25	12	33	36	40	59	54	282	57	62	374	493	779	1149
2010	12	3	7	9	20	17	16	16	21	17	18	141	22	15	129	166	310	6	10	17	12	23	28	35	62	40	64	291	54	44	319	417	714	1024
2011	1	2	10	16	17	18	9	10	11	13	26	130	19	19	124	162	294	6	6	22	11	26	19	23	26	41	53	227	54	53	323	430	663	957
2011	2	1	7	12	11	13	10	13	18	13	8	105	12	18	92	122	228	1	8	17	6	16	14	23	46	44	40	214	34	43	274	351	566	794
2011	3	3	10	13	13	29	19	14	23	28	29	178	14	26	166	206	387	5	11	30	17	19	26	41	58	48	63	313	58	59	376	493	811	1198
2011	4	4	6	8	15	15	17	12	13	22	25	133	14	14	126	154	291	0	17	20	7	24	29	34	46	52	50	279	56	56	371	483	762	1053
2011	5	5	12	11	23	18	17	25	18	19	26	169	20	15	154	189	363	5	18	16	15	29	22	31	49	63	65	308	54	68	417	539	852	1215
2011	6	3	9	14	15	24	14	15	26	24	28	169	20	22	132	174	346	3	14	14	16	26	21	28	40	69	61	289	55	55	355	465	757	1103
2011	7	3	8	14	16	19	16	24	11	16	17	141	21	21	127	169	313	5	16	13	17	18	21	35	54	73	52	299	50	53	346	449	753	1066
2011	8	2	9	14	24	15	11	11	16	10	33	143	19	24	142	185	330	6	13	14	15	13	25	37	60	59	77	313	66	55	351	472	791	1121
2011	9	8	21	22	19	14	15	21	16	22	25	175	17	25	127	169	352	9	17	13	18	14	30	28	45	57	68	290	79	64	334	477	776	1128
2011	10	2	19	13	19	17	11	16	16	18	21	150	19	28	109	156	308	4	11	20	19	25	18	29	44	51	51	268	54	41	292	387	659	967
2011	11	4	22	19	11	18	16	13	13	18	26	156	17	19	133	169	329	0	12	16	18	20	33	30	35	48	54	266	58	54	295	407	673	1002
2011	12	4	8	11	12	10	24	14	28	16	24	147	20	15	126	161	312	5	13	8	21	14	21	21	39	60	58	255	53	65	340	458	718	1030
2012	1	4	4	5	11	13	22	11	9	20	20	115	12	15	99	126	245	2	11	14	12	12	14	24	41	46	46	220	52	36	298	386	608	853
2012	2	3	8	10	12	20	8	13	11	15	19	116	21	12	116	149	268	4	12	20	16	22	28	20	39	50	54	261	65	42	330	437	702	970
2012	3	4	8	10	14	18	19	21	16	26	25	157	22	15	133	170	331	2	11	24	17	17	34	38	43	65	65	314	71	60	370	501	817	1148
2012	4	3	9	13	10	22	18	13	13	21	20	139	17	22	134	173	315	0	10	19	22	19	18	32	43	56	67	286	60	57	356	473	759	1074
2012	5	2	7	13	15	12	9	18	19	18	34	145	35	18	146	199	346	4	13	17	25	22	23	39	47	58	62	306	59	58	353	470	780	1126
2012	6	5	7	9	13	9	18	13	18	20	19	126	21	16	138	175	306	3	11	12	15	12	28	27	34	57	66	262	57	55	338	450	715	1021
2012	7	3	9	19	11	22	19	12	18	18	15	143	27	24	134	185	331	4	12	10	21	23	26	31	42	66	52	283	55	55	313	423	710	1041
2012	8	5	11	14	10	17	9	14	18	22	33	148	23	20	146	189	342	2	7	9	14	13	30	30	50	50	64	267	76	61	358	495	764	1106
2012	9	2	9	13	13	12	13	16	18	15	26	135	18	22	138	178	315	5	21	16	13	19	21	29	38	65	63	285	54	42	324	420	710	1025
2012	10	3	14	10	7	20	20	20	18	24	19	152	17	18	152	187	342	3	16	18	18	20	21	29	43	62	57	284	63	66	338	467	754	1096
2012	11	3	13	10	15	10	15	11	18	10	23	125	24	14	123	161	289	4	15	14	9	18	16	35	45	49	58	259	59	60	316	435	698	987
2012	12	3	5	9	19	9	9	13	13	12	20	109	14	12	116	142	254	4	7	12	14	13	17	25	44	46	58	236	66	25	305	396	636	890
2013	1	2	6	5	6	15	24	15	14	21	13	119	20	12	131	163	284	5	12	19	12	11	17	22	43	49	40	225	51	49	345	445	675	959
2013	2	1	5	12	9	10	10	10	10	14	15	95	20	14	85	119	215	1	9	11	14	14	20	27	22	44	51	212	43	24	248	315	528	743
2013	3	0	7	5	13	21	12	18	13	18	14	121	17	20	137	174	295	3	8	14	16	22	22	41	42	55	64	284	56	55	308	419	706	1001
2013	4	2	8	11	7	15	16	19	13	13	18	120	11	18	134	163	285	0	16	17	9	17	28	31	40	50	62	270	67	53	365	485	755	1040
2013	5	3	5	8	10	22	15	16	22	25	25	148	15	25	111	151	302	1	8	18	18	14	15	28	36	43	75	255	63	57	343	463	719	1021
2013	6	4	9	10	15	14	16	10	18	24	21	137	21	21	115	157	298	4	8	16	14	17	22	30	42	41	55	245	48	58	275	381	630	928
2013	7	7	7	11	15	17	15	14	9	30	28	146	23	28	132	183	336	4	9	19	9	23	22	26	42	46	63	259	61	62	387	510	773	1109
2013	8	2	8	9	13	13	13	9	20	18	18	121	18	17	129	164	287	0	12	18	14	28	22	24	47	45	62	272	56	67	323	446	718	1005
2013	9	5	7	12	5	11	13	10	14	17	21	110	17	12	122	151	266	1	17	18	17	17	25	33	30	33	43	233	57	45	298	400	634	900
2013	10	3	13	12	11	18	18	10	15	29	24	150	20	26	127	173	326	5	23	13	11	14	19	24	43	51	46	244	47	42	341	430	679	1005
2013	11	3	10	13	6	16	14	19	14	11	16	119	23	32	105	160	282	6	11	14	13	14	23	37	39	45	52	248	67	45	296	408	662	944
2013	12	4	9	15	14	13	17	6	13	15	22	124	21	14	118	153	281	1	10	8	12	15	18	25	31	35	35	189	51	49	302	402	592	873
2014	1	1	4	8	12	15	11	8	20	10	19	107	24	13	121	158	266	1	12	13	13	17	14	29	32	43	39	212	50	44	276	370	583	849
2014	2	2	1	8	7	11	16	11	9	15	19	97	16	18	103	137	236	3	8	9	7	14	31	23	37	29	41	199	51	48	291	390	592	828
2014	3	1	7	8	13	13	18	10	9	17	20	115	27	22	144	193	309	1	11	13	11	13	19	18	37	41	53	216	64	46	309	419	636	945
2014	4	0	9	7	11	11	20	18	17	21	26	140	24	24	131	179	319	4	15	19	11	19	27	28	46	50	70	285	64	69	336	469	758	1077
2014	5	0	8	6	8	12	20	10	21	29	21	135	25	22	140	187	322	4	10	19	13	21	22	27	40	54	61	267	67	73	348	488	759	1081
2014	6	3	2	8	13	11	11	11	19	13	16	104	20	24	134	178	285	2	5	10	11	20	16	27	29	62	47	227	73	53	271	397	626	911
2014	7	1	8	10	10	12	12	22	19	20	24	137	19	21	128	168	306	4	12	11	13	18	30	19	30	58	65	256	61	64	330	455	715	1021
2014	8	3	9	6	6	17	18	17	20	24	22	139	22	17	121	160	302	3	9	15	13	19	16	24	28	42	62	228	56	48	311	415	646	948
2014	9	1	13	4	6	12	16	7	15	13	19	105	25	16	135	176	282	2	15	12	20	20	11	18	36	45	57	234	66	58	296	420	656	938
2014	10	1	18	11	5	12	7	12	12	21	17	115	15	17	125	157	273	4	25	13	11	19	16	27	26	64	54	255	64	55	343	462	721	994
2014	11	4	8	8	11	9	9	10	10	18	18	101	21	18	102	141	246	1	10	9	12	24	14	24	36	46	42	217	47	45	266	358	576	822
2014	12	4	9	7	8	21	12	15	10	19	16	117	24	18	123	165	286	2	12	13	13	14	11	19	33	39	67	221	58	47	298	403	626	912
2015	1	1	3	2	9	11	17	12	10	14	10	88	16	16	121	153	242	3	10	13	8	10	16	22	33	53	54	219	55	49	282	386	608	850
2015	2	3	2	4	9	8	6	8	6	18	13	74	20	13	97	130	207	2	5	5	5	16	14	19	30	26	36	156	47	41	250	338	496	703
2015	3	4	4	10	8	7	16	11	6	10	20	92	32	20	124	176	272	5	4	11	11	12	22	33	35	44	51	223	59	45	314	418	646	918
2015	4	1	8	9	12	13	14	11	15	21	26	129	25	17	133	175	305	5	8	14	13	10	17	19	31	45	61	218	65	46	310	421	644	949
2015	5	2	6	4	15	10	13	10	7	23	13	101	22	13	121	156	259	2	10	14	16	8	15	29	33	49	56	230	72	57	317	446	678	937
2015	6	2	6	6	11	7	13	12	20	20	16	111	24	13	126	163	276	1	12	10	6	14	14	22	31	55	67	231	78	58	326	462	694	970
2015	7	1	3	14	11	17	8	10	11	17	14	105	29	27	143	199	305	2	8	11	11	14	13	14	44	45	60	220	59	48	328	435	657	962
2015	8	1	2	6	9	12	10	10	13	11	14	87	23	18	126	167	255	4	11	14	10	18	22	22	24	39	51	211	65	47	276	388	603	858
2015	9	1	7	7	10	20	10	8	9	12	15	98	26	21	109	156	255	3	10	11	10	14	13	24	34	41	41	198	50	53	295	398	599	854
2015	10	4	19	8	9	13	12	12	16	16	20	125	22	18	136	176	305	4	14	17	13	10	17	24	29	40	58	222	62	67	305	434	660	965
2015	11	3	7	4	10	11	20	6	16	19	14	107	18	21	113	152	262	1	8	8	14	14	19	11	28	49	49	200	61	40	278	379	580	842
2015	12	2	7	7	12	11	5	5	20	14	24	105	23	22	117	162	269	2	12	15	11	14	23	21	31	37	59	223	60	61	288	409	634	903
2016	1	2	5	4	6	12	7	3	5	21	22	85	15	19	110	144	231	3	7	14	7	8	10	27	32	39	43	187	51	45	270	366	556	787
2016	2	3	4	7	9	9	10	2	12	16	9	78	14	21	106	141	222	1	6	5	12	10	26	16	28	33	37	173	53	42	245	340	514	736
2016	3	3	6	8	7	16	5	15	9	14	21	101	19	24	122	165	269	1	6	8	9	9	11	12	25	52	49	181	77	50	298	425	607	876
2016	4	2	5	7	8	11	9	5	12	15	27	99	20	16	123	159	260	3	7	18	7	12	21	22	32	43	67	229	66	36	288	390	622	882
2016	5	5	2	15	5	16	13	13	12	16	23	115	30	17	127	174	294	0	8	14	15	16	13	27	33	60	52	238	70	73	315	458	696	990
2016	6	3	6	13	7	9	9	14	14	16	18	106	20	24	145	189	298	0	3	8	9	21	13	22	29	52	61	218	62	71	289	422	640	938
2016	7	2	6	5	14	10	9	7	12	16	24	103	21	31	120	172	277	6	9	10	8	12	17	19	24	35	49	183	51	55	310	416	605	882
2016	8	0	6	13	11	8	14	6	15	19	23	115	28	23	119	170	285	2	5	7	5	9	15	19	32	37	55	184	57	71	337	465	651	936
2016	9	0	4	4	7	14	11	8	8	8	20	84	24	26	109	159	243	2	6	8	7	18	15	13	34	45	59	205	43	67	273	383	590	833
2016	10	1	8	8	5	14	8	8	6	16	11	84	17	14	119	150	235	4	10	8	7	8	21	18	34	35	46	187	58	54	277	389	580	815
2016	11	2	6	6	8	14	10	6	17	17	17	101	21	21	99	141	244	2	7	10	10	9	13	21	27	45	38	180	66	45	306	417	599	843
2016	12	2	9	5	5	4	22	6	12	9	20	92	21	14	126	161	255	1	4	12	9	9	14	19	23	41	50	181	58	55	260	373	555	810
2017	1	2	4	2	8	5	14	9	10	16	16	84	16	16	113	145	231	0	8	8	9	10	22	12	25	39	48	181	42	53	224	319	500	731
2017	2	2	1	8	6	4	12	9	8	10	17	75	17	21	108	146	223	1	3	5	4	6	11	17	23	33	36	138	45	41	263	349	488	711
2017	3	4	5	13	10	7	13	9	12	14	25	108	19	17	117	153	265	1	4	17	6	11	16	18	31	41	44	188	56	58	268	382	571	836
2017	4	1	2	9	7	10	7	8	6	7	17	73	19	21	108	148	222	1	3	6	5	8	20	18	28	31	53	172	42	39	243	324	497	719
2017	5	5	4	7	13	9	5	10	12	19	21	100	18	16	121	155	260	5	4	13	8	8	14	20	30	43	61	201	48	57	268	373	579	839
2017	6	0	4	6	8	17	7	11	17	12	16	98	24	39	137	200	298	4	6	16	13	17	12	18	32	44	53	211	54	60	311	425	640	938
2017	7	1	6	9	8	10	15	12	18	23	19	120	28	14	121	163	284	4	4	6	11	11	22	27	29	38	51	199	44	69	276	389	592	876
2017	8	2	3	8	14	18	5	7	12	15	20	102	11	15	130	156	260	0	6	11	11	20	22	24	30	56	61	241	80	80	312	472	713	973
2017	9	1	8	3	6	7	13	10	6	17	17	87	23	28	107	158	246	0	10	10	8	7	15	24	25	41	45	185	59	56	256	371	556	802
2017	10	3	9	5	12	9	11	16	9	12	23	106	22	30	128	180	289	3	10	6	8	10	16	18	26	39	46	179	49	51	255	355	537	826
2017	11	2	6	8	6	6	7	7	9	12	13	74	30	31	119	180	256	1	3	9	6	6	19	20	20	29	41	153	51	62	243	356	510	766
2017	12	0	6	5	6	3	16	16	8	15	12	87	17	26	107	150	237	5	9	7	8	6	8	13	14	37	52	154	49	60	237	346	505	742
2018	1	1	6	5	6	7	13	11	6	19	22	95	20	19	118	157	253	2	4	12	8	20	10	18	12	40	58	182	49	72	264	385	569	822
2018	2	0	2	5	5	7	7	1	5	10	9	51	20	12	70	102	153	2	1	5	6	9	9	14	15	32	25	116	33	47	216	296	414	567
2018	3	2	4	6	6	7	13	9	8	13	16	82	20	21	112	153	237	5	6	9	13	15	23	14	24	35	58	197	54	56	259	369	571	808
2018	4	1	3	11	6	5	11	8	8	16	11	79	19	22	116	157	237	1	4	7	5	8	20	18	31	39	44	176	54	80	258	392	569	806
2018	5	0	2	3	4	10	9	10	11	14	17	80	26	19	127	172	252	4	6	4	12	14	9	15	30	44	42	176	71	59	292	422	602	854
2018	6	1	5	6	9	7	9	11	12	11	17	87	15	32	113	160	248	5	1	7	9	6	8	21	27	52	42	173	61	69	254	384	562	810
2018	7	0	2	8	9	9	14	6	6	13	13	80	17	24	101	142	222	0	4	13	14	10	14	21	26	37	48	187	63	60	265	388	575	797
2018	8	1	4	6	5	2	9	8	13	16	19	82	21	21	108	150	233	3	9	9	8	12	15	18	16	33	49	169	50	66	295	411	583	816
2018	9	1	2	9	10	9	5	10	13	13	14	85	18	16	104	138	224	3	5	6	6	10	22	14	28	23	28	142	48	70	230	348	493	717
2018	10	1	6	7	2	8	10	11	16	10	11	81	18	24	113	155	237	1	11	4	13	12	13	14	19	35	51	172	54	77	235	366	539	776
2018	11	0	6	7	6	5	12	8	18	10	19	91	17	13	107	137	228	3	10	3	6	6	11	17	24	25	48	150	33	57	246	336	489	717
2018	12	1	2	9	3	8	8	10	8	10	20	78	8	18	111	137	216	1	2	11	6	8	11	18	21	35	29	141	48	54	229	331	473	689
2019	1	0		6	6	8	10	11	12	18	19	90	19	19	110	148	238	1	4	9	4	12	11	22	19	37	46	164	52	53	259	364	529	767
2019	2	2	4	1	5	6	7	5	8	10	8	54	12	16	90	118	174	1	2	10	4	7	9	11	18	34	24	119	48	47	199	294	414	588
2019	3	1	2	4	4	13	13	7	11	5	18	77	21	19	116	156	234	1	8	5	7	8	13	18	22	34	44	159	56	50	235	341	501	735
2019	4	2	1	7	4	8	13	15	10	14	19	91	22	17	102	141	234	1	4	8	6	8	11	21	21	31	42	152	48	58	258	364	517	751
2019	5	2	3	11	11	8	8	6	12	16	11	86	24	25	97	146	234	1	5	8	6	10	8	22	31	26	44	160	54	59	279	392	553	787
2019	6	1	3	7	15	3	13	7	10	14	13	85	18	21	108	147	233	3	6	6	4	5	11	11	19	36	48	146	51	53	225	329	478	711
2019	7	1	3	7	7	6	10	11	11	13	19	87	17	27	96	140	228	2	1	9	12	6	12	15	22	30	45	152	59	63	256	378	532	760
2019	8	3	6	9	5	10	13	6	13	15	17	94	20	21	115	156	253	2	8	7	5	6	11	17	19	37	47	157	62	59	275	396	555	808
2019	9	1	7	4	6	8	6	8	12	14	12	77	19	18	89	126	204	1	7	6	5	4	13	17	23	31	31	137	51	47	180	278	416	620
2019	10	2	2	4	12	7	9	8	8	14	19	83	20	29	121	170	255	3	5	7	6	10	11	19	15	37	37	147	45	50	251	346	496	751
2019	11	1	3	5	6	5	9	10	10	13	14	75	21	25	113	159	235	2	4	6	7	6	13	16	29	27	43	151	68	47	260	375	528	763
2019	12	1	3	6	7	7	11	7	7	7	17	72	14	19	89	122	195	1	7	9	7	13	12	11	23	24	37	143	53	57	242	352	496	691
2020	1	0	5	4	5	7	6	9	3	10	11	60	19	23	82	124	184	1	4	3	5	6	12	16	17	25	38	126	31	62	229	322	449	633
2020	2	0		7	9	3	6	6	7	10	16	64	8	18	95	121	185	1	2	7	5	5	12	10	27	37	20	125	47	48	215	310	436	621
2020	3	4	4	4	6	7	11	7	9	14	13	75	18	16	98	132	211	2	3	5	5	6	13	11	17	29	42	131	57	50	242	349	482	693
2020	4	0	1	3	6	4	7	5	4	14	11	55	12	18	94	124	179	2	4	5	6	7	12	16	16	23	37	126	47	64	226	337	465	644
2020	5	0	2	4	5	7	10	6	15	12	10	71	14	23	101	138	209	0	3	4	5	11	12	12	16	26	37	126	37	39	207	283	409	618
2020	6	0	2	3	9	8	7	10	12	8	19	78	12	10	95	117	195	1	3	5	4	4	6	20	11	31	32	116	56	60	229	345	462	657
2020	7	2	2	3	7	3	6	10	10	12	20	73	15	18	93	126	201	2	3	1	6	5	12	13	17	40	33	130	49	51	254	354	486	687
2020	8	1	4	3	11	5	12	17	9	13	17	91	15	18	79	112	204	0	4	5	8	7	7	9	18	28	38	124	50	50	219	319	443	647
2020	9	1	3	3	8	7	7	10	8	12	10	68	20	25	97	142	211	1	6	8	5	12	7	16	17	26	38	135	30	62	220	312	448	659
2020	10	0	3	10	7	4	8	6	10	12	15	75	17	24	94	135	210	0	4	6	11	7	5	10	19	24	31	117	42	50	211	303	420	630
2020	11	1		2	3	7	4	13	3	9	15	56	17	28	91	136	193	1	4	4	6	8	14	13	14	19	28	110	46	68	228	342	453	646
2020	12	1	4	2	7	9	4	14	13	14	16	83	24	23	97	144	228	1	1	8	4	5	8	11	15	29	46	127	49	60	223	332	460	688
2021	1	2	3	14	10	15	13	7	7	7	11	87	11	22	74	107	196	0	2	14	17	6	10	15	14	28	32	138	38	42	209	289	427	623
2021	2	2	3	9	9	16	6	4	10	7	10	74	14	7	68	89	165	1	6	5	10	10	6	8	14	25	34	118	48	36	181	265	384	549
2021	3	1	4	11	19	19	14	12	16	10	9	114	17	18	95	130	245	0	2	4	15	17	16	24	16	31	40	165	47	57	251	355	520	765
2021	4	1	2	10	14	15	16	10	10	11	9	97	11	17	112	140	238	0	2	6	15	15	16	14	11	28	32	139	55	55	227	337	476	714
2021	5	5	1	11	17	12	13	11	8	10	16	99	26	22	72	120	224	1	4	10	13	10	11	11	19	24	43	145	35	34	202	271	417	641
2021	6	0	1	10	7	6	11	7	5	5	8	60	15	10	90	115	175	0	3	3	5	8	7	11	14	32	46	129	29	39	160	228	357	532
2021	7	1	1	3	10	8	11	7	5	7	11	63	16	10	61	87	151	0	2	6	8	9	9	8	16	22	31	111	36	54	159	249	360	511
2021	8	1	3	7	13	13	12	10	9	12	12	91	25	19	87	131	223	0	2	7	14	6	16	15	18	23	32	133	48	52	203	303	436	659
2021	9	0	2	6	20	7	20	11	7	18	15	106	21	20	101	142	248	0	2	6	17	15	14	24	18	18	33	147	35	69	214	318	465	713
2021	10	1	4	11	18	5	11	17	7	11	12	96	13	18	110	141	238	0	2	14	11	15	10	12	14	17	34	129	52	65	201	318	447	685
2021	11	1	7	5	11	8	10	10	9	8	18	86	16	11	112	139	226	0	10	17	12	17	14	15	19	28	39	171	44	49	225	318	489	715
2021	12	2	1	6	12	16	16	8	9	10	9	87	10	18	95	123	212	2	3	14	9	3	13	16	22	26	28	134	51	47	213	311	447	659
2022	1	0	4	3	11	15	15	11	10	6	11	86	17	17	90	124	210	0	3	10	11	9	16	13	22	21	18	123	42	43	178	263	386	596
2022	2	0	2	4	7	5	6	9	8	7	11	59	13	12	68	93	152	1	2	2	7	7	9	14	11	21	19	92	24	28	164	216	309	461
2022	3	0	2	9	15	13	12	6	9	12	10	88	12	16	93	121	209	0	2	10	14	10	10	17	17	22	40	142	43	45	191	279	421	630
2022	4	0	5	7	18	8	13	7	8	12	10	88	14	19	93	126	214	2	5	1	14	11	8	8	15	24	28	114	49	53	195	297	413	627
2022	5	0	2	10	12	14	15	14	8	4	12	91	7	16	95	118	209	0	3	10	12	8	11	24	15	27	25	135	32	50	192	274	409	618
2022	6	0	3	4	11	7	5	6	6	8	10	60	13	16	65	94	154	1	3	11	11	7	6	13	21	17	29	118	41	31	165	237	356	510
2022	7	1	2	13	6	14	11	7	5	13	15	86	10	19	77	106	193	0	2	11	12	13	10	17	11	24	39	139	42	49	205	296	435	628
2022	8	0	4	12	12	10	7	10	14	8	11	88	17	10	95	122	210	1	4	11	19	12	15	11	14	29	33	148	47	62	196	305	454	664
2022	9	1	4	3	12	12	8	10	8	12	15	84	13	21	81	115	200	0	8	13	8	17	12	14	18	18	29	137	53	63	229	345	482	682
2022	10	0	7	7	5	9	5	7	10	9	10	69	15	17	97	129	198	1	1	9	12	11	21	18	13	12	26	123	32	49	170	251	375	573
2022	11	1	3	4	18	8	17	15	12	10	11	98	18	22	99	139	238	1	6	13	15	10	8	15	18	25	26	136	38	49	202	289	426	664
2022	12	2	3	7	14	8	13	12	7	11	10	85	16	12	99	127	214	2	4	5	13	8	11	9	12	23	34	119	45	46	202	293	414	628
2023	1	0	5	5	7	6	12	7	5	7	10	64	10	15	72	97	161	1	2	8	9	6	12	6	18	17	22	100	36	44	173	253	354	515
2023	2	2	3	7	8	10	7	8	4	10	6	63	13	12	74	99	164	2	2	8	9	8	18	8	20	26	26	125	26	43	170	239	366	530
2023	3	2	2	5	16	12	9	8	15	9	13	89	16	15	112	143	234	1	2	13	18	13	11	18	15	25	26	141	46	53	242	341	483	717
2023	4	2	2	5	9	12	5	10	6	7	7	63	14	23	94	131	196	0	3	6	18	12	5	5	13	15	27	104	39	32	185	256	360	556
2023	5	1	4	8	6	14	5	12	11	9	17	86	14	12	107	133	220	2	2	2	14	11	10	21	17	25	35	137	40	59	230	329	468	688
2023	6	1	4	6	10	12	8	10	11	8	14	83	7	24	106	137	221	0		5	10	10	10	10	16	34	34	129	37	60	195	292	421	642
2023	7	0		4	14	8	10	11	7	8	14	76	12	11	93	116	192	1	4	8	13	10	5	9	14	16	45	124	43	49	190	282	407	599
2023	8	2	4	7	11	13	8	10	5	5	9	72	10	14	89	113	187	0	2	4	9	16	14	22	18	21	39	145	45	39	222	306	451	638
2023	9	0	4	3	11	11	11	8	3	7	7	65	17	19	67	103	168	0	1	8	15	8	9	16	19	21	23	120	37	45	212	294	414	582
2023	10	0	3	10	9	7	3	8	14	8	9	71	19	20	81	120	191	1	5	7	13	11	9	12	15	29	33	134	50	52	180	282	417	608
2023	11	1	1	11	6	3	11	11	10	4	10	67	14	17	92	123	191	0	3	9	13	11	18	15	18	20	32	139	35	36	191	262	401	592
2023	12	0	3	9	14	14	4	6	8	10	9	77	24	21	98	143	220	0	4	7	9	15	12	8	17	24	28	124	38	41	208	287	411	631
2024	1	1	2	5	10	13	9	9	8	11	6	73	14	16	65	95	169	0	2	7	11	12	18	10	9	23	26	118	44	33	194	271	389	558
2024	2	0	1	7	11	3	7	10	7	9	5	60	12	9	66	87	147	1	5	7	8	9	4	9	11	23	26	102	30	30	150	210	313	460
2024	3	0	3	8	9	10	15	4	6	5	12	72	16	15	71	102	174	1	1	6	13	14	11	12	19	24	26	126	36	54	178	268	395	569
2024	4	0	1	7	5	8	9	7	8	6	10	61	12	18	89	119	180	0	1	6	15	5	10	10	13	24	22	106	48	50	197	295	401	582
2024	5	0	2	10	12	14	14	9	11	10	11	93	12	22	83	117	210	0	1	8	13	11	8	11	20	17	33	122	38	47	204	289	411	621
2024	6	1	3	6	5	14	14	13	8	7	8	78	11	13	78	102	181	0	2	16	6	10	12	14	17	21	30	128	38	41	196	275	403	584
2024	7	0	3	5	16	6	7	12	13	9	9	80	15	11	77	103	183	0	3	9	18	12	7	15	15	21	27	127	38	54	166	258	385	568
2024	8	1	5	6	14	9	5	9	10	9	13	80	13	19	97	129	210	0	4	5	14	14	7	18	16	13	27	118	44	53	195	292	410	620
2024	9	0	4	4	5	10	11	6	7	6	10	63	14	16	91	121	184	0	3	5	12	12	9	7	18	23	25	114	38	55	166	259	373	557
2024	10	0	5	8	18	12	8	5	7	4	6	73	12	20	76	108	181	0	4	6	14	12	13	13	25	25	28	140	33	48	210	291	431	612
2024	11	0	2	14	7	7	12	11	9	8	8	78	12	11	100	123	201	2	2	13	10	11	9	9	24	14	14	106	30	50	172	252	360	561
2024	12	2	2	12	6	9	6	4	7	4	12	62	5	13	62	80	144	1		6	7	10	12	8	7	6	22	78	23	44	156	223	302	446

## Sheet: cases
year	mon	city	twon	gender	migratn	age	city_c	town_c	yt
2005	1	金門縣	金寧鄉	M	0	65~69	9020	9020040	1
2005	1	宜蘭縣	五結鄉	M	0	65~69	10002	10002090	1
2005	1	宜蘭縣	五結鄉	M	0	70+	10002	10002090	1
2005	1	宜蘭縣	冬山鄉	F	0	15~19	10002	10002080	1
2005	1	宜蘭縣	南澳鄉	M	0	20~24	10002	10002120	1
2005	1	宜蘭縣	南澳鄉	M	0	40~44	10002	10002120	1
2005	1	宜蘭縣	員山鄉	M	0	65~69	10002	10002070	1
2005	1	宜蘭縣	壯圍鄉	M	0	40~44	10002	10002060	1
2005	1	宜蘭縣	宜蘭市	M	0	55~59	10002	10002010	1
2005	1	宜蘭縣	羅東鎮	M	0	25~29	10002	10002020	1
2005	1	宜蘭縣	羅東鎮	F	0	35~39	10002	10002020	1
2005	1	宜蘭縣	羅東鎮	F	0	40~44	10002	10002020	1
2005	1	宜蘭縣	羅東鎮	F	0	45~49	10002	10002020	1
2005	1	宜蘭縣	蘇澳鎮	M	0	45~49	10002	10002030	1
2005	1	宜蘭縣	蘇澳鎮	M	0	50~54	10002	10002030	1
2005	1	宜蘭縣	蘇澳鎮	M	0	65~69	10002	10002030	1
2005	1	新竹縣	五峰鄉	F	0	20~24	10004	10004130	1
2005	1	新竹縣	五峰鄉	M	0	35~39	10004	10004130	1
2005	1	新竹縣	五峰鄉	F	0	45~49	10004	10004130	1
2005	1	新竹縣	寶山鄉	M	0	60~64	10004	10004100	1
2005	1	新竹縣	尖石鄉	M	0	20~24	10004	10004120	1
2005	1	新竹縣	尖石鄉	M	0	40~44	10004	10004120	1
2005	1	新竹縣	尖石鄉	M	0	50~54	10004	10004120	1
2005	1	新竹縣	尖石鄉	F	0	65~69	10004	10004120	1
2005	1	新竹縣	尖石鄉	F	0	70+	10004	10004120	2
2005	1	新竹縣	峨眉鄉	M	0	65~69	10004	10004110	1
2005	1	新竹縣	新埔鎮	F	0	25~29	10004	10004030	1
2005	1	新竹縣	新豐鄉	F	0	50~54	10004	10004060	1
2005	1	新竹縣	新豐鄉	M	0	70+	10004	10004060	2
2005	1	新竹縣	橫山鄉	F	0	25~29	10004	10004080	1
2005	1	新竹縣	湖口鄉	F	0	50~54	10004	10004050	1
2005	1	新竹縣	湖口鄉	M	0	70+	10004	10004050	1
2005	1	新竹縣	竹北市	F	0	35~39	10004	10004010	1
2005	1	新竹縣	竹北市	M	0	55~59	10004	10004010	1
2005	1	新竹縣	竹東鎮	M	0	20~24	10004	10004020	1
2005	1	新竹縣	竹東鎮	F	0	40~44	10004	10004020	1
2005	1	新竹縣	竹東鎮	M	0	40~44	10004	10004020	1
2005	1	新竹縣	竹東鎮	F	0	45~49	10004	10004020	1
2005	1	新竹縣	竹東鎮	F	0	55~59	10004	10004020	1
2005	1	新竹縣	竹東鎮	F	0	65~69	10004	10004020	1
2005	1	新竹縣	竹東鎮	F	0	70+	10004	10004020	2
2005	1	新竹縣	竹東鎮	M	0	70+	10004	10004020	2
2005	1	新竹縣	芎林鄉	F	0	50~54	10004	10004070	1
2005	1	新竹縣	芎林鄉	M	0	60~64	10004	10004070	1
2005	1	苗栗縣	三義鄉	F	0	10~14	10005	10005130	1
2005	1	苗栗縣	三義鄉	F	0	45~49	10005	10005130	1
2005	1	苗栗縣	公館鄉	M	0	25~29	10005	10005090	1
2005	1	苗栗縣	南庄鄉	M	0	70+	10005	10005110	1
2005	1	苗栗縣	竹南鎮	F	0	25~29	10005	10005040	1
2005	1	苗栗縣	竹南鎮	F	0	30~34	10005	10005040	1
2005	1	苗栗縣	竹南鎮	F	0	35~39	10005	10005040	1
2005	1	苗栗縣	竹南鎮	M	0	65~69	10005	10005040	1
2005	1	苗栗縣	竹南鎮	F	0	70+	10005	10005040	1
2005	1	苗栗縣	苑裡鎮	F	0	30~34	10005	10005020	1
2005	1	苗栗縣	苗栗市	F	0	15~19	10005	10005010	1
2005	1	苗栗縣	苗栗市	M	0	70+	10005	10005010	1
2005	1	苗栗縣	通霄鎮	F	0	35~39	10005	10005030	1
2005	1	苗栗縣	造橋鄉	F	0	70+	10005	10005150	1
2005	1	苗栗縣	造橋鄉	M	0	70+	10005	10005150	1
2005	1	苗栗縣	銅鑼鄉	F	0	70+	10005	10005100	1
2005	1	苗栗縣	銅鑼鄉	M	0	70+	10005	10005100	1
2005	1	苗栗縣	頭份市	M	0	30~34	10005	10005050	1
2005	1	苗栗縣	頭份市	F	0	35~39	10005	10005050	1
2005	1	苗栗縣	頭份市	M	0	45~49	10005	10005050	1
2005	1	苗栗縣	頭份市	M	0	60~64	10005	10005050	2
2005	1	苗栗縣	頭份市	M	0	65~69	10005	10005050	1
2005	1	苗栗縣	頭份市	F	0	70+	10005	10005050	1
2005	1	苗栗縣	頭份市	M	0	70+	10005	10005050	1
2005	1	彰化縣	二林鎮	M	0	60~64	10007	10007200	1
2005	1	彰化縣	二林鎮	F	0	70+	10007	10007200	1
2005	1	彰化縣	二林鎮	M	0	70+	10007	10007200	3
2005	1	彰化縣	二水鄉	M	0	60~64	10007	10007180	1
2005	1	彰化縣	二水鄉	M	0	70+	10007	10007180	1
2005	1	彰化縣	其他	F	0	60~64	10007	10007999	1
2005	1	彰化縣	其他	M	0	65~69	10007	10007999	1
2005	1	彰化縣	其他	F	0	70+	10007	10007999	1
2005	1	彰化縣	其他	M	0	70+	10007	10007999	1
2005	1	彰化縣	北斗鎮	M	0	70+	10007	10007190	2
2005	1	彰化縣	員林市	F	0	45~49	10007	10007100	1
2005	1	彰化縣	員林市	M	0	45~49	10007	10007100	1
2005	1	彰化縣	員林市	F	0	50~54	10007	10007100	1
2005	1	彰化縣	員林市	M	0	55~59	10007	10007100	1
2005	1	彰化縣	員林市	F	0	65~69	10007	10007100	1
2005	1	彰化縣	員林市	M	0	65~69	10007	10007100	1
2005	1	彰化縣	員林市	F	0	70+	10007	10007100	2
2005	1	彰化縣	員林市	M	0	70+	10007	10007100	1
2005	1	彰化縣	埔鹽鄉	F	0	50~54	10007	10007140	1
2005	1	彰化縣	埤頭鄉	F	0	70+	10007	10007220	1
2005	1	彰化縣	大城鄉	F	0	50~54	10007	10007240	1
2005	1	彰化縣	大城鄉	F	0	60~64	10007	10007240	1
2005	1	彰化縣	大城鄉	M	0	70+	10007	10007240	1
2005	1	彰化縣	大村鄉	F	0	70+	10007	10007130	1
2005	1	彰化縣	彰化市	M	0	10~14	10007	10007010	1
2005	1	彰化縣	彰化市	F	0	25~29	10007	10007010	1
2005	1	彰化縣	彰化市	F	0	30~34	10007	10007010	1
2005	1	彰化縣	彰化市	F	0	35~39	10007	10007010	1
2005	1	彰化縣	彰化市	M	0	50~54	10007	10007010	1
2005	1	彰化縣	彰化市	M	0	55~59	10007	10007010	1
2005	1	彰化縣	彰化市	F	0	60~64	10007	10007010	2
2005	1	彰化縣	彰化市	M	0	60~64	10007	10007010	2
2005	1	彰化縣	彰化市	M	0	65~69	10007	10007010	1
2005	1	彰化縣	彰化市	F	0	70+	10007	10007010	2
2005	1	彰化縣	彰化市	M	0	70+	10007	10007010	3
2005	1	彰化縣	溪州鄉	F	0	20~24	10007	10007260	1
2005	1	彰化縣	溪州鄉	M	0	45~49	10007	10007260	1
2005	1	彰化縣	溪州鄉	M	0	60~64	10007	10007260	1
2005	1	彰化縣	溪州鄉	F	0	70+	10007	10007260	1
2005	1	彰化縣	溪湖鎮	M	0	55~59	10007	10007110	1
2005	1	彰化縣	溪湖鎮	M	0	60~64	10007	10007110	1
2005	1	彰化縣	溪湖鎮	M	0	65~69	10007	10007110	2
2005	1	彰化縣	溪湖鎮	M	0	70+	10007	10007110	1
2005	1	彰化縣	田中鎮	M	0	40~44	10007	10007120	1
2005	1	彰化縣	田中鎮	F	0	60~64	10007	10007120	1
2005	1	彰化縣	田中鎮	M	0	65~69	10007	10007120	2
2005	1	彰化縣	田中鎮	F	0	70+	10007	10007120	1
2005	1	彰化縣	田中鎮	M	0	70+	10007	10007120	2
2005	1	彰化縣	田尾鄉	F	0	50~54	10007	10007210	1
2005	1	彰化縣	田尾鄉	M	0	70+	10007	10007210	2
2005	1	彰化縣	社頭鄉	M	0	65~69	10007	10007170	2
2005	1	彰化縣	社頭鄉	M	0	70+	10007	10007170	1
2005	1	彰化縣	福興鄉	F	0	15~19	10007	10007060	1
2005	1	彰化縣	福興鄉	M	0	45~49	10007	10007060	1
2005	1	彰化縣	秀水鄉	F	0	15~19	10007	10007070	2
2005	1	彰化縣	秀水鄉	F	0	55~59	10007	10007070	1
2005	1	彰化縣	竹塘鄉	M	0	40~44	10007	10007250	1
2005	1	彰化縣	線西鄉	M	0	60~64	10007	10007040	2
2005	1	彰化縣	線西鄉	M	0	65~69	10007	10007040	1
2005	1	彰化縣	芬園鄉	M	0	60~64	10007	10007090	1
2005	1	彰化縣	芬園鄉	F	0	70+	10007	10007090	1
2005	1	彰化縣	芳苑鄉	F	0	55~59	10007	10007230	2
2005	1	彰化縣	芳苑鄉	F	0	70+	10007	10007230	1
2005	1	彰化縣	鹿港鎮	M	0	50~54	10007	10007020	1
2005	1	彰化縣	鹿港鎮	F	0	65~69	10007	10007020	1
2005	1	彰化縣	鹿港鎮	M	0	65~69	10007	10007020	1
2005	1	彰化縣	鹿港鎮	M	0	70+	10007	10007020	2
2005	1	南投縣	中寮鄉	M	0	35~39	10008	10008080	1
2005	1	南投縣	中寮鄉	M	0	60~64	10008	10008080	1
2005	1	南投縣	中寮鄉	M	0	65~69	10008	10008080	1
2005	1	南投縣	仁愛鄉	F	0	15~19	10008	10008130	1
2005	1	南投縣	仁愛鄉	M	0	30~34	10008	10008130	1
2005	1	南投縣	仁愛鄉	M	0	40~44	10008	10008130	1
2005	1	南投縣	仁愛鄉	F	0	45~49	10008	10008130	2
2005	1	南投縣	仁愛鄉	M	0	55~59	10008	10008130	1
2005	1	南投縣	仁愛鄉	M	0	65~69	10008	10008130	1
2005	1	南投縣	仁愛鄉	F	0	70+	10008	10008130	2
2005	1	南投縣	仁愛鄉	M	0	70+	10008	10008130	1
2005	1	南投縣	信義鄉	F	0	70+	10008	10008120	1
2005	1	南投縣	信義鄉	M	0	70+	10008	10008120	1
2005	1	南投縣	南投市	M	0	20~24	10008	10008010	1
2005	1	南投縣	南投市	F	0	60~64	10008	10008010	1
2005	1	南投縣	南投市	M	0	60~64	10008	10008010	1
2005	1	南投縣	南投市	M	0	65~69	10008	10008010	1
2005	1	南投縣	南投市	F	0	70+	10008	10008010	2
2005	1	南投縣	南投市	M	0	70+	10008	10008010	1
2005	1	南投縣	名間鄉	M	0	65~69	10008	10008060	1
2005	1	南投縣	名間鄉	F	0	70+	10008	10008060	1
2005	1	南投縣	國姓鄉	M	0	35~39	10008	10008100	1
2005	1	南投縣	埔里鎮	M	0	25~29	10008	10008020	1
2005	1	南投縣	埔里鎮	M	0	40~44	10008	10008020	1
2005	1	南投縣	埔里鎮	M	0	60~64	10008	10008020	1
2005	1	南投縣	埔里鎮	F	0	70+	10008	10008020	1
2005	1	南投縣	埔里鎮	M	0	70+	10008	10008020	1
2005	1	南投縣	竹山鎮	M	0	70+	10008	10008040	1
2005	1	南投縣	草屯鎮	M	0	30~34	10008	10008030	1
2005	1	南投縣	草屯鎮	M	0	40~44	10008	10008030	1
2005	1	南投縣	草屯鎮	M	0	55~59	10008	10008030	1
2005	1	南投縣	草屯鎮	F	0	70+	10008	10008030	1
2005	1	南投縣	草屯鎮	M	0	70+	10008	10008030	1
2005	1	南投縣	魚池鄉	M	0	70+	10008	10008090	1
2005	1	雲林縣	二崙鄉	M	0	70+	10009	10009110	2
2005	1	雲林縣	元長鄉	F	0	70+	10009	10009170	1
2005	1	雲林縣	北港鎮	M	0	45~49	10009	10009060	1
2005	1	雲林縣	北港鎮	M	0	60~64	10009	10009060	1
2005	1	雲林縣	北港鎮	M	0	70+	10009	10009060	3
2005	1	雲林縣	口湖鄉	M	0	70+	10009	10009190	1
2005	1	雲林縣	古坑鄉	M	0	45~49	10009	10009070	1
2005	1	雲林縣	台西鄉	M	0	35~39	10009	10009160	1
2005	1	雲林縣	台西鄉	F	0	70+	10009	10009160	1
2005	1	雲林縣	四湖鄉	M	0	50~54	10009	10009180	1
2005	1	雲林縣	四湖鄉	M	0	55~59	10009	10009180	1
2005	1	雲林縣	四湖鄉	M	0	65~69	10009	10009180	1
2005	1	雲林縣	土庫鎮	M	0	65~69	10009	10009050	1
2005	1	雲林縣	土庫鎮	M	0	70+	10009	10009050	1
2005	1	雲林縣	大埤鄉	M	0	70+	10009	10009080	1
2005	1	雲林縣	崙背鄉	M	0	50~54	10009	10009120	1
2005	1	雲林縣	崙背鄉	F	0	70+	10009	10009120	1
2005	1	雲林縣	斗六市	F	0	30~34	10009	10009010	1
2005	1	雲林縣	斗六市	F	0	40~44	10009	10009010	1
2005	1	雲林縣	斗六市	M	0	70+	10009	10009010	4
2005	1	雲林縣	東勢鄉	F	0	70+	10009	10009140	1
2005	1	雲林縣	東勢鄉	M	0	70+	10009	10009140	1
2005	1	雲林縣	林內鄉	M	0	70+	10009	10009100	2
2005	1	雲林縣	水林鄉	M	0	40~44	10009	10009200	1
2005	1	雲林縣	水林鄉	F	0	50~54	10009	10009200	1
2005	1	雲林縣	水林鄉	M	0	70+	10009	10009200	1
2005	1	雲林縣	莿桐鄉	F	0	45~49	10009	10009090	1
2005	1	雲林縣	莿桐鄉	M	0	70+	10009	10009090	1
2005	1	雲林縣	虎尾鎮	M	0	25~29	10009	10009030	1
2005	1	雲林縣	虎尾鎮	M	0	45~49	10009	10009030	1
2005	1	雲林縣	虎尾鎮	M	0	55~59	10009	10009030	1
2005	1	雲林縣	虎尾鎮	F	0	60~64	10009	10009030	1
2005	1	雲林縣	虎尾鎮	M	0	60~64	10009	10009030	2
2005	1	雲林縣	虎尾鎮	M	0	70+	10009	10009030	1
2005	1	雲林縣	西螺鎮	M	0	35~39	10009	10009040	1
2005	1	雲林縣	西螺鎮	M	0	50~54	10009	10009040	2
2005	1	雲林縣	西螺鎮	M	0	55~59	10009	10009040	1
2005	1	雲林縣	西螺鎮	F	0	70+	10009	10009040	1
2005	1	雲林縣	西螺鎮	M	0	70+	10009	10009040	1
2005	1	雲林縣	麥寮鄉	M	0	65~69	10009	10009130	1
2005	1	雲林縣	麥寮鄉	M	0	70+	10009	10009130	1
2005	1	嘉義縣	中埔鄉	M	0	35~39	10010	10010130	1
2005	1	嘉義縣	六腳鄉	M	0	70+	10010	10010080	1
2005	1	嘉義縣	大林鎮	M	0	55~59	10010	10010040	2
2005	1	嘉義縣	太保市	M	0	55~59	10010	10010010	1
2005	1	嘉義縣	太保市	F	0	65~69	10010	10010010	1
2005	1	嘉義縣	太保市	M	0	70+	10010	10010010	2
2005	1	嘉義縣	布袋鎮	M	0	40~44	10010	10010030	1
2005	1	嘉義縣	布袋鎮	F	0	70+	10010	10010030	2
2005	1	嘉義縣	新港鄉	M	0	65~69	10010	10010070	1
2005	1	嘉義縣	新港鄉	F	0	70+	10010	10010070	1
2005	1	嘉義縣	朴子市	F	0	20~24	10010	10010020	1
2005	1	嘉義縣	朴子市	M	0	40~44	10010	10010020	2
2005	1	嘉義縣	朴子市	M	0	45~49	10010	10010020	1
2005	1	嘉義縣	朴子市	M	0	60~64	10010	10010020	1
2005	1	嘉義縣	朴子市	F	0	70+	10010	10010020	1
2005	1	嘉義縣	東石鄉	M	0	55~59	10010	10010090	1
2005	1	嘉義縣	東石鄉	M	0	70+	10010	10010090	1
2005	1	嘉義縣	梅山鄉	M	0	30~34	10010	10010150	1
2005	1	嘉義縣	梅山鄉	M	0	70+	10010	10010150	1
2005	1	嘉義縣	民雄鄉	M	0	30~34	10010	10010050	2
2005	1	嘉義縣	民雄鄉	M	0	70+	10010	10010050	1
2005	1	嘉義縣	竹崎鄉	M	0	65~69	10010	10010140	1
2005	1	嘉義縣	竹崎鄉	F	0	70+	10010	10010140	1
2005	1	嘉義縣	竹崎鄉	M	0	70+	10010	10010140	7
2005	1	嘉義縣	義竹鄉	F	0	70+	10010	10010100	1
2005	1	嘉義縣	鹿草鄉	M	0	25~29	10010	10010110	1
2005	1	嘉義縣	鹿草鄉	F	0	70+	10010	10010110	1
2005	1	屏東縣	三地門鄉	M	0	30~34	10013	10013260	1
2005	1	屏東縣	九如鄉	M	0	1	10013	10013080	1
2005	1	屏東縣	九如鄉	M	0	60~64	10013	10013080	1
2005	1	屏東縣	佳冬鄉	M	0	65~69	10013	10013210	1
2005	1	屏東縣	佳冬鄉	F	0	70+	10013	10013210	2
2005	1	屏東縣	內埔鄉	F	0	25~29	10013	10013130	1
2005	1	屏東縣	內埔鄉	M	0	65~69	10013	10013130	1
2005	1	屏東縣	內埔鄉	F	0	70+	10013	10013130	2
2005	1	屏東縣	內埔鄉	M	0	70+	10013	10013130	5
2005	1	屏東縣	屏東市	M	0	20~24	10013	10013010	1
2005	1	屏東縣	屏東市	F	0	30~34	10013	10013010	3
2005	1	屏東縣	屏東市	M	0	30~34	10013	10013010	1
2005	1	屏東縣	屏東市	M	0	35~39	10013	10013010	1
2005	1	屏東縣	屏東市	F	0	60~64	10013	10013010	1
2005	1	屏東縣	屏東市	M	0	60~64	10013	10013010	1
2005	1	屏東縣	屏東市	F	0	65~69	10013	10013010	2
2005	1	屏東縣	屏東市	M	0	65~69	10013	10013010	5
2005	1	屏東縣	屏東市	F	0	70+	10013	10013010	2
2005	1	屏東縣	屏東市	M	0	70+	10013	10013010	7
2005	1	屏東縣	恆春鎮	M	0	40~44	10013	10013040	1
2005	1	屏東縣	恆春鎮	F	0	45~49	10013	10013040	1
2005	1	屏東縣	恆春鎮	M	0	70+	10013	10013040	1
2005	1	屏東縣	新埤鄉	M	0	60~64	10013	10013150	1
2005	1	屏東縣	新埤鄉	F	0	70+	10013	10013150	1
2005	1	屏東縣	新埤鄉	M	0	70+	10013	10013150	2
2005	1	屏東縣	東港鎮	F	0	35~39	10013	10013030	1
2005	1	屏東縣	東港鎮	M	0	55~59	10013	10013030	1
2005	1	屏東縣	枋寮鄉	F	0	25~29	10013	10013160	1
2005	1	屏東縣	枋寮鄉	F	0	70+	10013	10013160	1
2005	1	屏東縣	滿州鄉	F	0	70+	10013	10013240	1
2005	1	屏東縣	滿州鄉	M	0	70+	10013	10013240	1
2005	1	屏東縣	潮州鎮	F	0	40~44	10013	10013020	1
2005	1	屏東縣	潮州鎮	M	0	55~59	10013	10013020	1
2005	1	屏東縣	潮州鎮	F	0	70+	10013	10013020	1
2005	1	屏東縣	牡丹鄉	M	0	70+	10013	10013330	1
2005	1	屏東縣	獅子鄉	F	0	40~44	10013	10013320	1
2005	1	屏東縣	瑪家鄉	M	0	30~34	10013	10013280	1
2005	1	屏東縣	瑪家鄉	M	0	35~39	10013	10013280	1
2005	1	屏東縣	瑪家鄉	F	0	70+	10013	10013280	1
2005	1	屏東縣	竹田鄉	F	0	70+	10013	10013140	1
2005	1	屏東縣	竹田鄉	M	0	70+	10013	10013140	1
2005	1	屏東縣	萬丹鄉	M	0	30~34	10013	10013050	1
2005	1	屏東縣	萬丹鄉	M	0	40~44	10013	10013050	1
2005	1	屏東縣	萬丹鄉	M	0	50~54	10013	10013050	1
2005	1	屏東縣	萬丹鄉	F	0	65~69	10013	10013050	1
2005	1	屏東縣	車城鄉	F	0	70+	10013	10013230	1
2005	1	屏東縣	長治鄉	F	0	60~64	10013	10013060	1
2005	1	屏東縣	長治鄉	M	0	60~64	10013	10013060	1
2005	1	屏東縣	長治鄉	F	0	70+	10013	10013060	1
2005	1	屏東縣	高樹鄉	F	0	70+	10013	10013110	2
2005	1	屏東縣	鹽埔鄉	M	0	65~69	10013	10013100	1
2005	1	屏東縣	鹽埔鄉	M	0	70+	10013	10013100	1
2005	1	屏東縣	麟洛鄉	M	0	65~69	10013	10013070	1
2005	1	台東縣	卑南鄉	M	0	70+	10014	10014040	1
2005	1	台東縣	台東市	F	0	45~49	10014	10014010	1
2005	1	台東縣	台東市	M	0	45~49	10014	10014010	2
2005	1	台東縣	台東市	M	0	60~64	10014	10014010	1
2005	1	台東縣	台東市	M	0	65~69	10014	10014010	1
2005	1	台東縣	台東市	F	0	70+	10014	10014010	1
2005	1	台東縣	台東市	M	0	70+	10014	10014010	3
2005	1	台東縣	大武鄉	F	0	70+	10014	10014100	1
2005	1	台東縣	太麻里鄉	F	0	15~19	10014	10014090	1
2005	1	台東縣	延平鄉	F	0	40~44	10014	10014130	1
2005	1	台東縣	成功鎮	M	0	70+	10014	10014020	1
2005	1	台東縣	池上鄉	M	0	70+	10014	10014060	1
2005	1	台東縣	長濱鄉	M	0	50~54	10014	10014080	1
2005	1	台東縣	關山鎮	F	0	70+	10014	10014030	1
2005	1	花蓮縣	光復鄉	M	0	60~64	10015	10015070	1
2005	1	花蓮縣	卓溪鄉	F	0	45~49	10015	10015130	1
2005	1	花蓮縣	卓溪鄉	F	0	55~59	10015	10015130	1
2005	1	花蓮縣	吉安鄉	M	0	15~19	10015	10015050	1
2005	1	花蓮縣	吉安鄉	M	0	20~24	10015	10015050	1
2005	1	花蓮縣	吉安鄉	M	0	45~49	10015	10015050	2
2005	1	花蓮縣	吉安鄉	F	0	70+	10015	10015050	2
2005	1	花蓮縣	吉安鄉	M	0	70+	10015	10015050	1
2005	1	花蓮縣	壽豐鄉	M	0	40~44	10015	10015060	1
2005	1	花蓮縣	壽豐鄉	M	0	70+	10015	10015060	1
2005	1	花蓮縣	新城鄉	M	0	35~39	10015	10015040	1
2005	1	花蓮縣	新城鄉	M	0	45~49	10015	10015040	1
2005	1	花蓮縣	新城鄉	M	0	70+	10015	10015040	1
2005	1	花蓮縣	玉里鎮	M	0	50~54	10015	10015030	2
2005	1	花蓮縣	玉里鎮	M	0	55~59	10015	10015030	1
2005	1	花蓮縣	玉里鎮	M	0	65~69	10015	10015030	1
2005	1	花蓮縣	玉里鎮	M	0	70+	10015	10015030	3
2005	1	花蓮縣	瑞穗鄉	F	0	10~14	10015	10015090	1
2005	1	花蓮縣	瑞穗鄉	M	0	55~59	10015	10015090	1
2005	1	花蓮縣	瑞穗鄉	M	0	5~9	10015	10015090	1
2005	1	花蓮縣	瑞穗鄉	F	0	65~69	10015	10015090	1
2005	1	花蓮縣	瑞穗鄉	M	0	70+	10015	10015090	1
2005	1	花蓮縣	秀林鄉	F	0	10~14	10015	10015110	1
2005	1	花蓮縣	秀林鄉	F	0	25~29	10015	10015110	1
2005	1	花蓮縣	秀林鄉	M	0	35~39	10015	10015110	2
2005	1	花蓮縣	秀林鄉	M	0	40~44	10015	10015110	2
2005	1	花蓮縣	秀林鄉	F	0	50~54	10015	10015110	1
2005	1	花蓮縣	秀林鄉	M	0	65~69	10015	10015110	1
2005	1	花蓮縣	秀林鄉	F	0	70+	10015	10015110	1
2005	1	花蓮縣	秀林鄉	M	0	70+	10015	10015110	1
2005	1	花蓮縣	花蓮市	F	0	20~24	10015	10015010	2
2005	1	花蓮縣	花蓮市	M	0	25~29	10015	10015010	1
2005	1	花蓮縣	花蓮市	F	0	30~34	10015	10015010	1
2005	1	花蓮縣	花蓮市	M	0	35~39	10015	10015010	1
2005	1	花蓮縣	花蓮市	F	0	45~49	10015	10015010	1
2005	1	花蓮縣	花蓮市	F	0	65~69	10015	10015010	1
2005	1	花蓮縣	花蓮市	M	0	65~69	10015	10015010	1
2005	1	花蓮縣	花蓮市	M	0	70+	10015	10015010	2
2005	1	花蓮縣	萬榮鄉	F	0	10~14	10015	10015120	1
2005	1	花蓮縣	萬榮鄉	F	0	15~19	10015	10015120	1
2005	1	花蓮縣	萬榮鄉	F	0	20~24	10015	10015120	1
2005	1	花蓮縣	豐濱鄉	M	0	25~29	10015	10015080	1
2005	1	花蓮縣	豐濱鄉	M	0	60~64	10015	10015080	1
2005	1	花蓮縣	鳳林鎮	M	0	65~69	10015	10015020	1
2005	1	花蓮縣	鳳林鎮	F	0	70+	10015	10015020	1
2005	1	澎湖縣	白沙鄉	F	0	30~34	10016	10016030	1
2005	1	基隆市	七堵區	M	0	50~54	10017	10017020	1
2005	1	基隆市	七堵區	M	0	60~64	10017	10017020	1
2005	1	基隆市	七堵區	M	0	70+	10017	10017020	1
2005	1	基隆市	中山區	M	0	65~69	10017	10017050	1
2005	1	基隆市	中山區	M	0	70+	10017	10017050	1
2005	1	基隆市	中正區	M	0	70+	10017	10017010	2
2005	1	基隆市	仁愛區	M	0	45~49	10017	10017040	1
2005	1	基隆市	仁愛區	F	0	50~54	10017	10017040	1
2005	1	基隆市	仁愛區	M	0	50~54	10017	10017040	1
2005	1	基隆市	仁愛區	M	0	70+	10017	10017040	2
2005	1	基隆市	信義區	M	0	30~34	10017	10017070	1
2005	1	基隆市	信義區	M	0	35~39	10017	10017070	1
2005	1	基隆市	信義區	F	0	55~59	10017	10017070	1
2005	1	基隆市	信義區	M	0	65~69	10017	10017070	1
2005	1	基隆市	信義區	F	0	70+	10017	10017070	1
2005	1	基隆市	安樂區	M	0	25~29	10017	10017060	1
2005	1	基隆市	安樂區	M	0	45~49	10017	10017060	1
2005	1	基隆市	安樂區	F	0	65~69	10017	10017060	1
2005	1	基隆市	安樂區	M	0	65~69	10017	10017060	1
2005	1	基隆市	安樂區	F	0	70+	10017	10017060	1
2005	1	基隆市	安樂區	M	0	70+	10017	10017060	1
2005	1	基隆市	暖暖區	F	0	30~34	10017	10017030	1
2005	1	基隆市	暖暖區	M	0	65~69	10017	10017030	1
2005	1	新竹市	北區	M	0	25~29	10018	10018020	1
2005	1	新竹市	北區	M	0	30~34	10018	10018020	1
2005	1	新竹市	北區	M	0	40~44	10018	10018020	1
2005	1	新竹市	北區	M	0	45~49	10018	10018020	1
2005	1	新竹市	北區	M	0	55~59	10018	10018020	1
2005	1	新竹市	北區	M	0	60~64	10018	10018020	1
2005	1	新竹市	北區	M	0	70+	10018	10018020	2
2005	1	新竹市	東區	F	0	15~19	10018	10018010	1
2005	1	新竹市	東區	F	0	25~29	10018	10018010	1
2005	1	新竹市	東區	M	0	35~39	10018	10018010	1
2005	1	新竹市	東區	M	0	50~54	10018	10018010	1
2005	1	新竹市	東區	F	0	70+	10018	10018010	1
2005	1	新竹市	東區	M	0	70+	10018	10018010	1
2005	1	新竹市	香山區	M	0	35~39	10018	10018030	1
2005	1	新竹市	香山區	M	0	40~44	10018	10018030	2
2005	1	新竹市	香山區	M	0	70+	10018	10018030	1
2005	1	嘉義市	東區	M	0	50~54	10020	10020010	1
2005	1	嘉義市	東區	F	0	70+	10020	10020010	1
2005	1	嘉義市	東區	M	0	70+	10020	10020010	3
2005	1	嘉義市	西區	M	0	15~19	10020	10020020	1
2005	1	嘉義市	西區	F	0	20~24	10020	10020020	1
2005	1	嘉義市	西區	M	0	45~49	10020	10020020	1
2005	1	嘉義市	西區	F	0	50~54	10020	10020020	2
2005	1	嘉義市	西區	M	0	60~64	10020	10020020	1
2005	1	台北市	中山區	F	0	20~24	63000	63000040	2
2005	1	台北市	中山區	F	0	30~34	63000	63000040	1
2005	1	台北市	中山區	F	0	60~64	63000	63000040	1
2005	1	台北市	中山區	M	0	60~64	63000	63000040	1
2005	1	台北市	中山區	F	0	70+	63000	63000040	1
2005	1	台北市	中山區	M	0	70+	63000	63000040	2
2005	1	台北市	中正區	M	0	70+	63000	63000050	1
2005	1	台北市	信義區	F	0	15~19	63000	63000020	1
2005	1	台北市	信義區	F	0	25~29	63000	63000020	1
2005	1	台北市	信義區	F	0	30~34	63000	63000020	1
2005	1	台北市	信義區	F	0	40~44	63000	63000020	1
2005	1	台北市	信義區	M	0	40~44	63000	63000020	1
2005	1	台北市	信義區	F	0	55~59	63000	63000020	1
2005	1	台北市	信義區	M	0	60~64	63000	63000020	1
2005	1	台北市	信義區	F	0	65~69	63000	63000020	2
2005	1	台北市	信義區	M	0	65~69	63000	63000020	2
2005	1	台北市	信義區	M	0	70+	63000	63000020	2
2005	1	台北市	內湖區	F	0	15~19	63000	63000100	1
2005	1	台北市	內湖區	M	0	20~24	63000	63000100	1
2005	1	台北市	內湖區	M	0	65~69	63000	63000100	1
2005	1	台北市	內湖區	M	0	70+	63000	63000100	2
2005	1	台北市	北投區	F	0	10~14	63000	63000120	1
2005	1	台北市	北投區	F	0	20~24	63000	63000120	1
2005	1	台北市	北投區	F	0	25~29	63000	63000120	1
2005	1	台北市	北投區	F	0	30~34	63000	63000120	1
2005	1	台北市	北投區	M	0	35~39	63000	63000120	1
2005	1	台北市	北投區	F	0	45~49	63000	63000120	1
2005	1	台北市	北投區	M	0	45~49	63000	63000120	1
2005	1	台北市	北投區	M	0	55~59	63000	63000120	1
2005	1	台北市	北投區	F	0	60~64	63000	63000120	1
2005	1	台北市	北投區	M	0	60~64	63000	63000120	2
2005	1	台北市	北投區	M	0	65~69	63000	63000120	1
2005	1	台北市	北投區	F	0	70+	63000	63000120	6
2005	1	台北市	北投區	M	0	70+	63000	63000120	6
2005	1	台北市	南港區	M	0	55~59	63000	63000090	1
2005	1	台北市	南港區	M	0	70+	63000	63000090	1
2005	1	台北市	士林區	M	0	35~39	63000	63000110	1
2005	1	台北市	士林區	M	0	50~54	63000	63000110	2
2005	1	台北市	士林區	M	0	55~59	63000	63000110	1
2005	1	台北市	士林區	F	0	60~64	63000	63000110	1
2005	1	台北市	士林區	M	0	65~69	63000	63000110	1
2005	1	台北市	士林區	F	0	70+	63000	63000110	1
2005	1	台北市	士林區	M	0	70+	63000	63000110	2
2005	1	台北市	大同區	F	0	25~29	63000	63000060	2
2005	1	台北市	大同區	M	0	50~54	63000	63000060	1
2005	1	台北市	大同區	M	0	60~64	63000	63000060	2
2005	1	台北市	大同區	F	0	70+	63000	63000060	1
2005	1	台北市	大同區	M	0	70+	63000	63000060	1
2005	1	台北市	大安區	M	0	30~34	63000	63000030	1
2005	1	台北市	大安區	F	0	35~39	63000	63000030	2
2005	1	台北市	大安區	F	0	50~54	63000	63000030	1
2005	1	台北市	大安區	M	0	50~54	63000	63000030	1
2005	1	台北市	大安區	M	0	60~64	63000	63000030	1
2005	1	台北市	大安區	M	0	65~69	63000	63000030	1
2005	1	台北市	大安區	F	0	70+	63000	63000030	1
2005	1	台北市	大安區	M	0	70+	63000	63000030	6
2005	1	台北市	文山區	F	0	10~14	63000	63000080	1
2005	1	台北市	文山區	M	0	25~29	63000	63000080	1
2005	1	台北市	文山區	M	0	30~34	63000	63000080	1
2005	1	台北市	文山區	F	0	35~39	63000	63000080	1
2005	1	台北市	文山區	F	0	70+	63000	63000080	1
2005	1	台北市	文山區	M	0	70+	63000	63000080	1
2005	1	台北市	松山區	M	0	25~29	63000	63000010	1
2005	1	台北市	松山區	F	0	35~39	63000	63000010	1
2005	1	台北市	松山區	F	0	50~54	63000	63000010	1
2005	1	台北市	松山區	F	0	55~59	63000	63000010	1
2005	1	台北市	松山區	F	0	65~69	63000	63000010	1
2005	1	台北市	松山區	M	0	70+	63000	63000010	2
2005	1	台北市	萬華區	F	0	30~34	63000	63000070	1
2005	1	台北市	萬華區	M	0	35~39	63000	63000070	1
2005	1	台北市	萬華區	M	0	50~54	63000	63000070	1
2005	1	台北市	萬華區	M	0	60~64	63000	63000070	2
2005	1	台北市	萬華區	F	0	65~69	63000	63000070	1
2005	1	台北市	萬華區	M	0	65~69	63000	63000070	1
2005	1	台北市	萬華區	M	0	70+	63000	63000070	4
2005	1	高雄市	三民區	M	0	25~29	64000	64000050	1
2005	1	高雄市	三民區	M	0	30~34	64000	64000050	1
2005	1	高雄市	三民區	F	0	40~44	64000	64000050	1
2005	1	高雄市	三民區	M	0	45~49	64000	64000050	3
2005	1	高雄市	三民區	M	0	55~59	64000	64000050	2
2005	1	高雄市	三民區	M	0	60~64	64000	64000050	2
2005	1	高雄市	三民區	F	0	65~69	64000	64000050	2
2005	1	高雄市	三民區	M	0	65~69	64000	64000050	1
2005	1	高雄市	三民區	F	0	70+	64000	64000050	6
2005	1	高雄市	三民區	M	0	70+	64000	64000050	3
2005	1	高雄市	仁武區	F	0	20~24	64000	64000170	1
2005	1	高雄市	仁武區	M	0	35~39	64000	64000170	1
2005	1	高雄市	仁武區	F	0	50~54	64000	64000170	1
2005	1	高雄市	仁武區	M	0	65~69	64000	64000170	1
2005	1	高雄市	內門區	M	0	70+	64000	64000350	2
2005	1	高雄市	前金區	F	0	35~39	64000	64000070	1
2005	1	高雄市	前鎮區	M	0	25~29	64000	64000090	1
2005	1	高雄市	前鎮區	M	0	35~39	64000	64000090	1
2005	1	高雄市	前鎮區	F	0	40~44	64000	64000090	2
2005	1	高雄市	前鎮區	M	0	40~44	64000	64000090	1
2005	1	高雄市	前鎮區	F	0	45~49	64000	64000090	1
2005	1	高雄市	前鎮區	M	0	45~49	64000	64000090	2
2005	1	高雄市	前鎮區	F	0	65~69	64000	64000090	1
2005	1	高雄市	前鎮區	M	0	65~69	64000	64000090	1
2005	1	高雄市	前鎮區	F	0	70+	64000	64000090	1
2005	1	高雄市	前鎮區	M	0	70+	64000	64000090	3
2005	1	高雄市	大寮區	M	0	50~54	64000	64000140	1
2005	1	高雄市	大寮區	M	0	55~59	64000	64000140	1
2005	1	高雄市	大寮區	F	0	60~64	64000	64000140	1
2005	1	高雄市	大寮區	M	0	60~64	64000	64000140	1
2005	1	高雄市	大寮區	F	0	70+	64000	64000140	2
2005	1	高雄市	大寮區	M	0	70+	64000	64000140	2
2005	1	高雄市	大樹區	F	0	70+	64000	64000150	1
2005	1	高雄市	大樹區	M	0	70+	64000	64000150	1
2005	1	高雄市	大社區	M	0	20~24	64000	64000160	1
2005	1	高雄市	大社區	F	0	25~29	64000	64000160	1
2005	1	高雄市	大社區	M	0	70+	64000	64000160	1
2005	1	高雄市	小港區	M	0	50~54	64000	64000110	2
2005	1	高雄市	小港區	M	0	55~59	64000	64000110	1
2005	1	高雄市	小港區	M	0	70+	64000	64000110	2
2005	1	高雄市	岡山區	M	0	45~49	64000	64000190	1
2005	1	高雄市	岡山區	F	0	55~59	64000	64000190	1
2005	1	高雄市	岡山區	M	0	55~59	64000	64000190	1
2005	1	高雄市	岡山區	M	0	70+	64000	64000190	7
2005	1	高雄市	左營區	M	0	15~19	64000	64000030	1
2005	1	高雄市	左營區	M	0	40~44	64000	64000030	1
2005	1	高雄市	左營區	M	0	5~9	64000	64000030	1
2005	1	高雄市	左營區	F	0	65~69	64000	64000030	1
2005	1	高雄市	左營區	M	0	65~69	64000	64000030	1
2005	1	高雄市	左營區	F	0	70+	64000	64000030	1
2005	1	高雄市	左營區	M	0	70+	64000	64000030	5
2005	1	高雄市	彌陀區	M	0	15~19	64000	64000280	1
2005	1	高雄市	彌陀區	F	0	70+	64000	64000280	1
2005	1	高雄市	旗山區	F	0	30~34	64000	64000300	1
2005	1	高雄市	旗津區	M	0	20~24	64000	64000100	1
2005	1	高雄市	旗津區	M	0	70+	64000	64000100	1
2005	1	高雄市	林園區	F	0	40~44	64000	64000130	1
2005	1	高雄市	林園區	M	0	40~44	64000	64000130	1
2005	1	高雄市	林園區	M	0	60~64	64000	64000130	1
2005	1	高雄市	林園區	M	0	65~69	64000	64000130	1
2005	1	高雄市	林園區	F	0	70+	64000	64000130	1
2005	1	高雄市	林園區	M	0	70+	64000	64000130	1
2005	1	高雄市	桃源區	F	0	15~19	64000	64000370	1
2005	1	高雄市	桃源區	F	0	25~29	64000	64000370	1
2005	1	高雄市	桃源區	M	0	30~34	64000	64000370	1
2005	1	高雄市	桃源區	M	0	55~59	64000	64000370	1
2005	1	高雄市	梓官區	M	0	50~54	64000	64000290	1
2005	1	高雄市	梓官區	M	0	55~59	64000	64000290	1
2005	1	高雄市	梓官區	F	0	60~64	64000	64000290	1
2005	1	高雄市	梓官區	M	0	60~64	64000	64000290	2
2005	1	高雄市	梓官區	F	0	70+	64000	64000290	1
2005	1	高雄市	梓官區	M	0	70+	64000	64000290	2
2005	1	高雄市	楠梓區	M	0	35~39	64000	64000040	1
2005	1	高雄市	楠梓區	M	0	40~44	64000	64000040	1
2005	1	高雄市	楠梓區	M	0	45~49	64000	64000040	1
2005	1	高雄市	楠梓區	F	0	55~59	64000	64000040	1
2005	1	高雄市	楠梓區	M	0	65~69	64000	64000040	1
2005	1	高雄市	楠梓區	F	0	70+	64000	64000040	1
2005	1	高雄市	楠梓區	M	0	70+	64000	64000040	2
2005	1	高雄市	橋頭區	M	0	50~54	64000	64000200	1
2005	1	高雄市	橋頭區	F	0	70+	64000	64000200	2
2005	1	高雄市	永安區	M	0	60~64	64000	64000270	1
2005	1	高雄市	永安區	M	0	65~69	64000	64000270	1
2005	1	高雄市	湖內區	M	0	45~49	64000	64000250	1
2005	1	高雄市	湖內區	M	0	50~54	64000	64000250	1
2005	1	高雄市	湖內區	M	0	70+	64000	64000250	1
2005	1	高雄市	燕巢區	M	0	40~44	64000	64000210	1
2005	1	高雄市	燕巢區	M	0	60~64	64000	64000210	1
2005	1	高雄市	燕巢區	M	0	70+	64000	64000210	3
2005	1	高雄市	田寮區	M	0	70+	64000	64000220	1
2005	1	高雄市	甲仙區	M	0	55~59	64000	64000330	1
2005	1	高雄市	美濃區	F	0	15~19	64000	64000310	1
2005	1	高雄市	美濃區	M	0	45~49	64000	64000310	1
2005	1	高雄市	美濃區	F	0	70+	64000	64000310	1
2005	1	高雄市	美濃區	M	0	70+	64000	64000310	2
2005	1	高雄市	苓雅區	M	0	20~24	64000	64000080	1
2005	1	高雄市	苓雅區	F	0	25~29	64000	64000080	1
2005	1	高雄市	苓雅區	F	0	30~34	64000	64000080	1
2005	1	高雄市	苓雅區	M	0	60~64	64000	64000080	1
2005	1	高雄市	苓雅區	F	0	70+	64000	64000080	1
2005	1	高雄市	茄萣區	F	0	55~59	64000	64000260	1
2005	1	高雄市	茄萣區	M	0	65~69	64000	64000260	1
2005	1	高雄市	路竹區	M	0	10~14	64000	64000240	1
2005	1	高雄市	路竹區	F	0	35~39	64000	64000240	1
2005	1	高雄市	路竹區	M	0	60~64	64000	64000240	1
2005	1	高雄市	路竹區	F	0	70+	64000	64000240	3
2005	1	高雄市	路竹區	M	0	70+	64000	64000240	2
2005	1	高雄市	那瑪夏區	M	0	70+	64000	64000380	1
2005	1	高雄市	阿蓮區	M	0	70+	64000	64000230	2
2005	1	高雄市	鳥松區	F	0	50~54	64000	64000180	1
2005	1	高雄市	鳳山區	M	0	15~19	64000	64000120	2
2005	1	高雄市	鳳山區	F	0	20~24	64000	64000120	1
2005	1	高雄市	鳳山區	F	0	30~34	64000	64000120	1
2005	1	高雄市	鳳山區	M	0	35~39	64000	64000120	1
2005	1	高雄市	鳳山區	F	0	40~44	64000	64000120	1
2005	1	高雄市	鳳山區	M	0	40~44	64000	64000120	2
2005	1	高雄市	鳳山區	M	0	50~54	64000	64000120	1
2005	1	高雄市	鳳山區	F	0	55~59	64000	64000120	1
2005	1	高雄市	鳳山區	M	0	60~64	64000	64000120	1
2005	1	高雄市	鳳山區	F	0	65~69	64000	64000120	1
2005	1	高雄市	鳳山區	M	0	65~69	64000	64000120	3
2005	1	高雄市	鳳山區	F	0	70+	64000	64000120	2
2005	1	高雄市	鳳山區	M	0	70+	64000	64000120	9
2005	1	高雄市	鹽埕區	F	0	55~59	64000	64000010	1
2005	1	高雄市	鹽埕區	F	0	60~64	64000	64000010	2
2005	1	高雄市	鹽埕區	F	0	70+	64000	64000010	1
2005	1	高雄市	鼓山區	M	0	20~24	64000	64000020	1
2005	1	高雄市	鼓山區	F	0	35~39	64000	64000020	1
2005	1	高雄市	鼓山區	F	0	70+	64000	64000020	1
2005	1	高雄市	鼓山區	M	0	70+	64000	64000020	3
2005	1	新北市	三峽區	M	0	35~39	65000	65000090	1
2005	1	新北市	三峽區	F	0	40~44	65000	65000090	1
2005	1	新北市	三峽區	M	0	40~44	65000	65000090	1
2005	1	新北市	三峽區	M	0	45~49	65000	65000090	1
2005	1	新北市	三峽區	M	0	50~54	65000	65000090	1
2005	1	新北市	三峽區	M	0	65~69	65000	65000090	3
2005	1	新北市	三重區	M	0	15~19	65000	65000020	1
2005	1	新北市	三重區	M	0	25~29	65000	65000020	1
2005	1	新北市	三重區	F	0	35~39	65000	65000020	1
2005	1	新北市	三重區	M	0	40~44	65000	65000020	1
2005	1	新北市	三重區	F	0	50~54	65000	65000020	1
2005	1	新北市	三重區	M	0	50~54	65000	65000020	2
2005	1	新北市	三重區	M	0	55~59	65000	65000020	1
2005	1	新北市	三重區	M	0	60~64	65000	65000020	3
2005	1	新北市	三重區	M	0	65~69	65000	65000020	1
2005	1	新北市	三重區	F	0	70+	65000	65000020	3
2005	1	新北市	三重區	M	0	70+	65000	65000020	3
2005	1	新北市	中和區	F	0	20~24	65000	65000030	1
2005	1	新北市	中和區	M	0	30~34	65000	65000030	2
2005	1	新北市	中和區	M	0	35~39	65000	65000030	1
2005	1	新北市	中和區	F	0	45~49	65000	65000030	1
2005	1	新北市	中和區	F	0	50~54	65000	65000030	1
2005	1	新北市	中和區	M	0	50~54	65000	65000030	1
2005	1	新北市	中和區	F	0	65~69	65000	65000030	1
2005	1	新北市	中和區	F	0	70+	65000	65000030	3
2005	1	新北市	中和區	M	0	70+	65000	65000030	6
2005	1	新北市	五股區	M	0	40~44	65000	65000150	1
2005	1	新北市	五股區	M	0	70+	65000	65000150	3
2005	1	新北市	八里區	F	0	30~34	65000	65000230	1
2005	1	新北市	八里區	M	0	40~44	65000	65000230	1
2005	1	新北市	八里區	M	0	65~69	65000	65000230	1
2005	1	新北市	八里區	M	0	70+	65000	65000230	1
2005	1	新北市	土城區	F	0	25~29	65000	65000130	1
2005	1	新北市	土城區	M	0	35~39	65000	65000130	1
2005	1	新北市	土城區	F	0	45~49	65000	65000130	1
2005	1	新北市	土城區	M	0	65~69	65000	65000130	2
2005	1	新北市	土城區	M	0	70+	65000	65000130	1
2005	1	新北市	平溪區	M	0	55~59	65000	65000240	1
2005	1	新北市	平溪區	M	0	70+	65000	65000240	2
2005	1	新北市	新店區	F	0	40~44	65000	65000060	1
2005	1	新北市	新店區	M	0	60~64	65000	65000060	2
2005	1	新北市	新店區	F	0	65~69	65000	65000060	1
2005	1	新北市	新店區	M	0	65~69	65000	65000060	3
2005	1	新北市	新店區	M	0	70+	65000	65000060	4
2005	1	新北市	新莊區	F	0	15~19	65000	65000050	1
2005	1	新北市	新莊區	F	0	35~39	65000	65000050	1
2005	1	新北市	新莊區	M	0	35~39	65000	65000050	1
2005	1	新北市	新莊區	F	0	40~44	65000	65000050	1
2005	1	新北市	新莊區	M	0	40~44	65000	65000050	1
2005	1	新北市	新莊區	F	0	45~49	65000	65000050	1
2005	1	新北市	新莊區	M	0	45~49	65000	65000050	3
2005	1	新北市	新莊區	M	0	50~54	65000	65000050	1
2005	1	新北市	新莊區	M	0	55~59	65000	65000050	1
2005	1	新北市	新莊區	M	0	60~64	65000	65000050	2
2005	1	新北市	新莊區	M	0	65~69	65000	65000050	2
2005	1	新北市	新莊區	F	0	70+	65000	65000050	2
2005	1	新北市	新莊區	M	0	70+	65000	65000050	2
2005	1	新北市	板橋區	F	0	20~24	65000	65000010	1
2005	1	新北市	板橋區	M	0	20~24	65000	65000010	1
2005	1	新北市	板橋區	F	0	30~34	65000	65000010	1
2005	1	新北市	板橋區	F	0	35~39	65000	65000010	1
2005	1	新北市	板橋區	M	0	40~44	65000	65000010	1
2005	1	新北市	板橋區	M	0	45~49	65000	65000010	2
2005	1	新北市	板橋區	M	0	55~59	65000	65000010	2
2005	1	新北市	板橋區	F	0	65~69	65000	65000010	1
2005	1	新北市	板橋區	M	0	65~69	65000	65000010	1
2005	1	新北市	板橋區	F	0	70+	65000	65000010	2
2005	1	新北市	板橋區	M	0	70+	65000	65000010	7
2005	1	新北市	林口區	F	0	25~29	65000	65000170	1
2005	1	新北市	林口區	F	0	50~54	65000	65000170	1
2005	1	新北市	林口區	M	0	50~54	65000	65000170	1
2005	1	新北市	林口區	M	0	60~64	65000	65000170	1
2005	1	新北市	樹林區	M	0	10~14	65000	65000070	1
2005	1	新北市	樹林區	F	0	20~24	65000	65000070	1
2005	1	新北市	樹林區	M	0	45~49	65000	65000070	1
2005	1	新北市	樹林區	M	0	60~64	65000	65000070	1
2005	1	新北市	樹林區	M	0	65~69	65000	65000070	1
2005	1	新北市	樹林區	M	0	70+	65000	65000070	1
2005	1	新北市	永和區	F	0	45~49	65000	65000040	1
2005	1	新北市	永和區	M	0	60~64	65000	65000040	1
2005	1	新北市	永和區	F	0	65~69	65000	65000040	1
2005	1	新北市	永和區	M	0	65~69	65000	65000040	1
2005	1	新北市	永和區	F	0	70+	65000	65000040	1
2005	1	新北市	永和區	M	0	70+	65000	65000040	2
2005	1	新北市	汐止區	F	0	25~29	65000	65000110	1
2005	1	新北市	汐止區	M	0	35~39	65000	65000110	1
2005	1	新北市	汐止區	F	0	40~44	65000	65000110	1
2005	1	新北市	汐止區	F	0	70+	65000	65000110	1
2005	1	新北市	汐止區	M	0	70+	65000	65000110	1
2005	1	新北市	泰山區	F	0	25~29	65000	65000160	1
2005	1	新北市	泰山區	F	0	35~39	65000	65000160	1
2005	1	新北市	泰山區	M	0	40~44	65000	65000160	1
2005	1	新北市	泰山區	M	0	45~49	65000	65000160	1
2005	1	新北市	泰山區	M	0	50~54	65000	65000160	1
2005	1	新北市	泰山區	M	0	60~64	65000	65000160	1
2005	1	新北市	泰山區	F	0	65~69	65000	65000160	1
2005	1	新北市	泰山區	F	0	70+	65000	65000160	1
2005	1	新北市	淡水區	M	0	20~24	65000	65000100	1
2005	1	新北市	淡水區	F	0	30~34	65000	65000100	1
2005	1	新北市	淡水區	M	0	30~34	65000	65000100	1
2005	1	新北市	淡水區	M	0	55~59	65000	65000100	1
2005	1	新北市	淡水區	M	0	70+	65000	65000100	1
2005	1	新北市	深坑區	M	0	65~69	65000	65000180	1
2005	1	新北市	瑞芳區	M	0	70+	65000	65000120	1
2005	1	新北市	石碇區	M	0	15~19	65000	65000190	1
2005	1	新北市	蘆洲區	M	0	15~19	65000	65000140	1
2005	1	新北市	蘆洲區	M	0	50~54	65000	65000140	1
2005	1	新北市	蘆洲區	M	0	55~59	65000	65000140	1
2005	1	新北市	蘆洲區	M	0	60~64	65000	65000140	2
2005	1	新北市	蘆洲區	M	0	65~69	65000	65000140	4
2005	1	新北市	蘆洲區	F	0	70+	65000	65000140	2
2005	1	新北市	蘆洲區	M	0	70+	65000	65000140	2
2005	1	新北市	貢寮區	M	0	65~69	65000	65000260	1
2005	1	新北市	金山區	M	0	70+	65000	65000270	1
2005	1	新北市	雙溪區	M	0	60~64	65000	65000250	2
2005	1	新北市	雙溪區	M	0	70+	65000	65000250	1
2005	1	新北市	鶯歌區	F	0	15~19	65000	65000080	1
2005	1	新北市	鶯歌區	M	0	25~29	65000	65000080	1
2005	1	新北市	鶯歌區	M	0	45~49	65000	65000080	2
2005	1	新北市	鶯歌區	M	0	60~64	65000	65000080	1
2005	1	新北市	鶯歌區	F	0	65~69	65000	65000080	1
2005	1	新北市	鶯歌區	M	0	65~69	65000	65000080	1
2005	1	台中市	中區	M	0	60~64	66000	66000010	1
2005	1	台中市	中區	M	0	70+	66000	66000010	1
2005	1	台中市	北區	M	0	10~14	66000	66000050	1
2005	1	台中市	北區	F	0	35~39	66000	66000050	1
2005	1	台中市	北區	M	0	70+	66000	66000050	1
2005	1	台中市	北屯區	F	0	20~24	66000	66000080	1
2005	1	台中市	北屯區	M	0	20~24	66000	66000080	1
2005	1	台中市	北屯區	F	0	40~44	66000	66000080	2
2005	1	台中市	北屯區	M	0	40~44	66000	66000080	1
2005	1	台中市	北屯區	F	0	55~59	66000	66000080	1
2005	1	台中市	北屯區	F	0	60~64	66000	66000080	1
2005	1	台中市	北屯區	M	0	70+	66000	66000080	3
2005	1	台中市	南區	M	0	30~34	66000	66000030	1
2005	1	台中市	南區	F	0	70+	66000	66000030	1
2005	1	台中市	南區	M	0	70+	66000	66000030	3
2005	1	台中市	南屯區	M	0	30~34	66000	66000070	1
2005	1	台中市	南屯區	M	0	45~49	66000	66000070	1
2005	1	台中市	南屯區	F	0	60~64	66000	66000070	1
2005	1	台中市	南屯區	M	0	60~64	66000	66000070	1
2005	1	台中市	南屯區	M	0	65~69	66000	66000070	1
2005	1	台中市	南屯區	F	0	70+	66000	66000070	1
2005	1	台中市	南屯區	M	0	70+	66000	66000070	3
2005	1	台中市	后里區	F	0	55~59	66000	66000150	1
2005	1	台中市	外埔區	M	0	70+	66000	66000210	1
2005	1	台中市	大安區	M	0	30~34	66000	66000220	1
2005	1	台中市	大安區	F	0	60~64	66000	66000220	1
2005	1	台中市	大安區	M	0	70+	66000	66000220	2
2005	1	台中市	大甲區	M	0	35~39	66000	66000110	1
2005	1	台中市	大甲區	M	0	65~69	66000	66000110	1
2005	1	台中市	大甲區	M	0	70+	66000	66000110	3
2005	1	台中市	大肚區	F	0	4	66000	66000240	1
2005	1	台中市	大肚區	M	0	45~49	66000	66000240	2
2005	1	台中市	大肚區	F	0	70+	66000	66000240	1
2005	1	台中市	大肚區	M	0	70+	66000	66000240	1
2005	1	台中市	大里區	F	0	25~29	66000	66000280	1
2005	1	台中市	大里區	F	0	70+	66000	66000280	3
2005	1	台中市	大里區	M	0	70+	66000	66000280	2
2005	1	台中市	大雅區	M	0	40~44	66000	66000180	1
2005	1	台中市	大雅區	M	0	60~64	66000	66000180	1
2005	1	台中市	太平區	M	0	30~34	66000	66000270	1
2005	1	台中市	太平區	M	0	45~49	66000	66000270	1
2005	1	台中市	太平區	F	0	50~54	66000	66000270	1
2005	1	台中市	太平區	M	0	70+	66000	66000270	4
2005	1	台中市	新社區	M	0	50~54	66000	66000190	1
2005	1	台中市	新社區	M	0	60~64	66000	66000190	1
2005	1	台中市	新社區	M	0	65~69	66000	66000190	2
2005	1	台中市	新社區	M	0	70+	66000	66000190	1
2005	1	台中市	東區	F	0	35~39	66000	66000020	1
2005	1	台中市	東區	M	0	50~54	66000	66000020	1
2005	1	台中市	東區	M	0	70+	66000	66000020	1
2005	1	台中市	東勢區	F	0	15~19	66000	66000100	1
2005	1	台中市	梧棲區	F	0	70+	66000	66000140	1
2005	1	台中市	沙鹿區	M	0	45~49	66000	66000130	1
2005	1	台中市	沙鹿區	F	0	55~59	66000	66000130	1
2005	1	台中市	沙鹿區	F	0	70+	66000	66000130	1
2005	1	台中市	沙鹿區	M	0	70+	66000	66000130	1
2005	1	台中市	清水區	M	0	50~54	66000	66000120	2
2005	1	台中市	清水區	M	0	55~59	66000	66000120	1
2005	1	台中市	清水區	F	0	70+	66000	66000120	1
2005	1	台中市	潭子區	M	0	50~54	66000	66000170	1
2005	1	台中市	潭子區	F	0	60~64	66000	66000170	1
2005	1	台中市	潭子區	F	0	70+	66000	66000170	1
2005	1	台中市	潭子區	M	0	70+	66000	66000170	1
2005	1	台中市	烏日區	M	0	45~49	66000	66000230	1
2005	1	台中市	烏日區	M	0	50~54	66000	66000230	1
2005	1	台中市	烏日區	M	0	65~69	66000	66000230	2
2005	1	台中市	烏日區	M	0	70+	66000	66000230	2
2005	1	台中市	神岡區	F	0	70+	66000	66000160	2
2005	1	台中市	神岡區	M	0	70+	66000	66000160	1
2005	1	台中市	西區	M	0	20~24	66000	66000040	1
2005	1	台中市	西區	M	0	40~44	66000	66000040	1
2005	1	台中市	西區	F	0	65~69	66000	66000040	1
2005	1	台中市	西區	M	0	65~69	66000	66000040	1
2005	1	台中市	西區	M	0	70+	66000	66000040	3
2005	1	台中市	西屯區	F	0	50~54	66000	66000060	1
2005	1	台中市	西屯區	M	0	50~54	66000	66000060	1
2005	1	台中市	西屯區	F	0	55~59	66000	66000060	1
2005	1	台中市	西屯區	M	0	70+	66000	66000060	5
2005	1	台中市	豐原區	M	0	25~29	66000	66000090	1
2005	1	台中市	豐原區	M	0	40~44	66000	66000090	1
2005	1	台中市	豐原區	M	0	55~59	66000	66000090	2
2005	1	台中市	豐原區	M	0	60~64	66000	66000090	1
2005	1	台中市	豐原區	M	0	70+	66000	66000090	2
2005	1	台中市	霧峰區	M	0	25~29	66000	66000260	1
2005	1	台中市	霧峰區	M	0	35~39	66000	66000260	1
2005	1	台中市	霧峰區	F	0	60~64	66000	66000260	1
2005	1	台中市	霧峰區	M	0	70+	66000	66000260	1
2005	1	台中市	龍井區	M	0	70+	66000	66000250	1
2005	1	台南市	七股區	M	0	55~59	67000	67000150	1
2005	1	台南市	七股區	M	0	60~64	67000	67000150	1
2005	1	台南市	七股區	M	0	70+	67000	67000150	1
2005	1	台南市	下營區	F	0	25~29	67000	67000080	1
2005	1	台南市	下營區	M	0	70+	67000	67000080	2
2005	1	台南市	中西區	M	0	25~29	67000	67000370	1
2005	1	台南市	中西區	F	0	35~39	67000	67000370	1
2005	1	台南市	中西區	M	0	55~59	67000	67000370	1
2005	1	台南市	中西區	M	0	70+	67000	67000370	1
2005	1	台南市	仁德區	M	0	15~19	67000	67000270	1
2005	1	台南市	仁德區	M	0	60~64	67000	67000270	1
2005	1	台南市	仁德區	M	0	65~69	67000	67000270	1
2005	1	台南市	仁德區	F	0	70+	67000	67000270	1
2005	1	台南市	仁德區	M	0	70+	67000	67000270	3
2005	1	台南市	佳里區	M	0	50~54	67000	67000120	2
2005	1	台南市	佳里區	F	0	60~64	67000	67000120	1
2005	1	台南市	佳里區	M	0	65~69	67000	67000120	1
2005	1	台南市	佳里區	M	0	70+	67000	67000120	4
2005	1	台南市	六甲區	M	0	40~44	67000	67000090	1
2005	1	台南市	北區	F	0	25~29	67000	67000340	1
2005	1	台南市	北區	F	0	30~34	67000	67000340	1
2005	1	台南市	北區	M	0	45~49	67000	67000340	1
2005	1	台南市	北區	M	0	50~54	67000	67000340	1
2005	1	台南市	北區	M	0	65~69	67000	67000340	1
2005	1	台南市	北區	F	0	70+	67000	67000340	1
2005	1	台南市	北區	M	0	70+	67000	67000340	3
2005	1	台南市	南區	F	0	20~24	67000	67000330	1
2005	1	台南市	南區	M	0	20~24	67000	67000330	1
2005	1	台南市	南區	M	0	35~39	67000	67000330	1
2005	1	台南市	南區	F	0	40~44	67000	67000330	1
2005	1	台南市	南區	F	0	60~64	67000	67000330	1
2005	1	台南市	南區	M	0	70+	67000	67000330	1
2005	1	台南市	善化區	M	0	45~49	67000	67000190	1
2005	1	台南市	善化區	M	0	50~54	67000	67000190	1
2005	1	台南市	善化區	F	0	70+	67000	67000190	1
2005	1	台南市	學甲區	F	0	60~64	67000	67000130	1
2005	1	台南市	學甲區	M	0	70+	67000	67000130	1
2005	1	台南市	安南區	M	0	25~29	67000	67000350	1
2005	1	台南市	安南區	M	0	35~39	67000	67000350	1
2005	1	台南市	安南區	M	0	40~44	67000	67000350	1
2005	1	台南市	安南區	F	0	50~54	67000	67000350	1
2005	1	台南市	安南區	M	0	50~54	67000	67000350	2
2005	1	台南市	安南區	M	0	60~64	67000	67000350	1
2005	1	台南市	安南區	M	0	65~69	67000	67000350	1
2005	1	台南市	安南區	F	0	70+	67000	67000350	1
2005	1	台南市	安南區	M	0	70+	67000	67000350	3
2005	1	台南市	安定區	F	0	60~64	67000	67000210	1
2005	1	台南市	安平區	F	0	55~59	67000	67000360	1
2005	1	台南市	安平區	M	0	55~59	67000	67000360	2
2005	1	台南市	官田區	M	0	30~34	67000	67000100	1
2005	1	台南市	官田區	M	0	70+	67000	67000100	1
2005	1	台南市	左鎮區	M	0	70+	67000	67000260	1
2005	1	台南市	後壁區	F	0	70+	67000	67000050	1
2005	1	台南市	後壁區	M	0	70+	67000	67000050	1
2005	1	台南市	新化區	M	0	70+	67000	67000180	1
2005	1	台南市	新市區	F	0	35~39	67000	67000200	1
2005	1	台南市	新營區	F	0	70+	67000	67000010	1
2005	1	台南市	新營區	M	0	70+	67000	67000010	2
2005	1	台南市	東區	M	0	20~24	67000	67000320	1
2005	1	台南市	東區	F	0	25~29	67000	67000320	1
2005	1	台南市	東區	F	0	30~34	67000	67000320	1
2005	1	台南市	東區	M	0	40~44	67000	67000320	1
2005	1	台南市	東區	F	0	55~59	67000	67000320	1
2005	1	台南市	東區	F	0	60~64	67000	67000320	1
2005	1	台南市	東區	F	0	70+	67000	67000320	1
2005	1	台南市	東區	M	0	70+	67000	67000320	6
2005	1	台南市	東山區	M	0	45~49	67000	67000060	1
2005	1	台南市	東山區	M	0	55~59	67000	67000060	1
2005	1	台南市	東山區	M	0	70+	67000	67000060	2
2005	1	台南市	柳營區	M	0	20~24	67000	67000040	1
2005	1	台南市	柳營區	F	0	35~39	67000	67000040	1
2005	1	台南市	柳營區	F	0	65~69	67000	67000040	1
2005	1	台南市	歸仁區	F	0	60~64	67000	67000280	1
2005	1	台南市	歸仁區	M	0	70+	67000	67000280	1
2005	1	台南市	永康區	M	0	35~39	67000	67000310	1
2005	1	台南市	永康區	F	0	40~44	67000	67000310	2
2005	1	台南市	永康區	M	0	40~44	67000	67000310	1
2005	1	台南市	永康區	M	0	55~59	67000	67000310	1
2005	1	台南市	永康區	M	0	60~64	67000	67000310	1
2005	1	台南市	永康區	F	0	70+	67000	67000310	1
2005	1	台南市	永康區	M	0	70+	67000	67000310	1
2005	1	台南市	玉井區	F	0	70+	67000	67000230	1
2005	1	台南市	白河區	F	0	25~29	67000	67000030	1
2005	1	台南市	白河區	M	0	50~54	67000	67000030	1
2005	1	台南市	白河區	M	0	70+	67000	67000030	1
2005	1	台南市	西港區	F	0	25~29	67000	67000140	1
2005	1	台南市	西港區	F	0	35~39	67000	67000140	1
2005	1	台南市	西港區	M	0	70+	67000	67000140	2
2005	1	台南市	關廟區	M	0	20~24	67000	67000290	1
2005	1	台南市	關廟區	M	0	55~59	67000	67000290	1
2005	1	台南市	關廟區	M	0	70+	67000	67000290	1
2005	1	台南市	鹽水區	M	0	45~49	67000	67000020	1
2005	1	台南市	鹽水區	F	0	55~59	67000	67000020	1
2005	1	台南市	麻豆區	M	0	55~59	67000	67000070	1
2005	1	台南市	麻豆區	M	0	70+	67000	67000070	3
2005	1	台南市	龍崎區	M	0	45~49	67000	67000300	1
2005	1	桃園市	中壢區	F	0	15~19	68000	68000020	2
2005	1	桃園市	中壢區	F	0	20~24	68000	68000020	1
2005	1	桃園市	中壢區	M	0	20~24	68000	68000020	1
2005	1	桃園市	中壢區	M	0	25~29	68000	68000020	2
2005	1	桃園市	中壢區	F	0	30~34	68000	68000020	1
2005	1	桃園市	中壢區	M	0	30~34	68000	68000020	1
2005	1	桃園市	中壢區	F	0	35~39	68000	68000020	1
2005	1	桃園市	中壢區	F	0	45~49	68000	68000020	1
2005	1	桃園市	中壢區	M	0	50~54	68000	68000020	1
2005	1	桃園市	中壢區	M	0	55~59	68000	68000020	1
2005	1	桃園市	中壢區	M	0	60~64	68000	68000020	1
2005	1	桃園市	中壢區	F	0	70+	68000	68000020	2
2005	1	桃園市	中壢區	M	0	70+	68000	68000020	3
2005	1	桃園市	八德區	F	0	30~34	68000	68000080	1
2005	1	桃園市	八德區	F	0	40~44	68000	68000080	2
2005	1	桃園市	八德區	M	0	45~49	68000	68000080	1
2005	1	桃園市	八德區	F	0	50~54	68000	68000080	1
2005	1	桃園市	八德區	F	0	55~59	68000	68000080	1
2005	1	桃園市	八德區	F	0	65~69	68000	68000080	1
2005	1	桃園市	八德區	M	0	70+	68000	68000080	3
2005	1	桃園市	大園區	M	0	25~29	68000	68000060	1
2005	1	桃園市	大園區	F	0	40~44	68000	68000060	1
2005	1	桃園市	大園區	M	0	40~44	68000	68000060	2
2005	1	桃園市	大園區	F	0	70+	68000	68000060	1
2005	1	桃園市	大園區	M	0	70+	68000	68000060	2
2005	1	桃園市	大溪區	F	0	30~34	68000	68000030	1
2005	1	桃園市	大溪區	M	0	40~44	68000	68000030	1
2005	1	桃園市	大溪區	M	0	70+	68000	68000030	2
2005	1	桃園市	平鎮區	M	0	20~24	68000	68000100	2
2005	1	桃園市	平鎮區	M	0	25~29	68000	68000100	1
2005	1	桃園市	平鎮區	F	0	55~59	68000	68000100	1
2005	1	桃園市	平鎮區	M	0	65~69	68000	68000100	1
2005	1	桃園市	平鎮區	F	0	70+	68000	68000100	1
2005	1	桃園市	平鎮區	M	0	70+	68000	68000100	1
2005	1	桃園市	復興區	F	0	20~24	68000	68000130	1
2005	1	桃園市	復興區	F	0	25~29	68000	68000130	1
2005	1	桃園市	復興區	M	0	55~59	68000	68000130	1
2005	1	桃園市	復興區	F	0	60~64	68000	68000130	1
2005	1	桃園市	新屋區	M	0	65~69	68000	68000110	1
2005	1	桃園市	新屋區	F	0	70+	68000	68000110	1
2005	1	桃園市	桃園區	F	0	15~19	68000	68000010	1
2005	1	桃園市	桃園區	M	0	15~19	68000	68000010	1
2005	1	桃園市	桃園區	F	0	20~24	68000	68000010	2
2005	1	桃園市	桃園區	M	0	20~24	68000	68000010	1
2005	1	桃園市	桃園區	F	0	30~34	68000	68000010	1
2005	1	桃園市	桃園區	F	0	35~39	68000	68000010	1
2005	1	桃園市	桃園區	M	0	40~44	68000	68000010	3
2005	1	桃園市	桃園區	F	0	45~49	68000	68000010	2
2005	1	桃園市	桃園區	M	0	60~64	68000	68000010	2
2005	1	桃園市	桃園區	F	0	65~69	68000	68000010	1
2005	1	桃園市	桃園區	M	0	65~69	68000	68000010	1
2005	1	桃園市	桃園區	F	0	70+	68000	68000010	2
2005	1	桃園市	桃園區	M	0	70+	68000	68000010	4
2005	1	桃園市	楊梅區	F	0	45~49	68000	68000040	1
2005	1	桃園市	楊梅區	M	0	45~49	68000	68000040	1
2005	1	桃園市	楊梅區	F	0	55~59	68000	68000040	1
2005	1	桃園市	楊梅區	M	0	60~64	68000	68000040	1
2005	1	桃園市	楊梅區	M	0	70+	68000	68000040	3
2005	1	桃園市	蘆竹區	F	0	45~49	68000	68000050	1
2005	1	桃園市	蘆竹區	M	0	70+	68000	68000050	3
2005	1	桃園市	觀音區	M	0	40~44	68000	68000120	1
2005	1	桃園市	觀音區	F	0	50~54	68000	68000120	1
2005	1	桃園市	龍潭區	M	0	20~24	68000	68000090	1
2005	1	桃園市	龍潭區	F	0	35~39	68000	68000090	1
2005	1	桃園市	龍潭區	F	0	55~59	68000	68000090	1
2005	1	桃園市	龍潭區	M	0	70+	68000	68000090	2
2005	1	桃園市	龜山區	F	0	20~24	68000	68000070	1
2005	1	桃園市	龜山區	M	0	30~34	68000	68000070	1
2005	1	桃園市	龜山區	M	0	45~49	68000	68000070	1
2005	1	桃園市	龜山區	F	0	50~54	68000	68000070	1
2005	1	桃園市	龜山區	F	0	55~59	68000	68000070	1
2005	1	桃園市	龜山區	M	0	55~59	68000	68000070	1
2005	1	桃園市	龜山區	F	0	60~64	68000	68000070	1
2005	1	桃園市	龜山區	M	0	65~69	68000	68000070	1
2005	1	桃園市	龜山區	F	0	70+	68000	68000070	1
2005	1	桃園市	龜山區	M	0	70+	68000	68000070	1
2005	2	宜蘭縣	三星鄉	M	0	45~49	10002	10002100	1
2005	2	宜蘭縣	五結鄉	F	0	50~54	10002	10002090	1
2005	2	宜蘭縣	冬山鄉	M	0	70+	10002	10002080	2
2005	2	宜蘭縣	南澳鄉	M	0	55~59	10002	10002120	1
2005	2	宜蘭縣	員山鄉	F	0	70+	10002	10002070	1
2005	2	宜蘭縣	壯圍鄉	F	0	65~69	10002	10002060	1
2005	2	宜蘭縣	壯圍鄉	M	0	70+	10002	10002060	1
2005	2	宜蘭縣	大同鄉	M	0	40~44	10002	10002110	1
2005	2	宜蘭縣	宜蘭市	M	0	15~19	10002	10002010	2
2005	2	宜蘭縣	宜蘭市	M	0	55~59	10002	10002010	1
2005	2	宜蘭縣	宜蘭市	F	0	70+	10002	10002010	1
2005	2	宜蘭縣	礁溪鄉	M	0	65~69	10002	10002050	1
2005	2	宜蘭縣	礁溪鄉	M	0	70+	10002	10002050	1
2005	2	宜蘭縣	羅東鎮	M	0	50~54	10002	10002020	1
2005	2	宜蘭縣	羅東鎮	F	0	70+	10002	10002020	1
2005	2	宜蘭縣	羅東鎮	M	0	70+	10002	10002020	3
2005	2	宜蘭縣	蘇澳鎮	M	0	50~54	10002	10002030	1
2005	2	宜蘭縣	頭城鎮	F	0	55~59	10002	10002040	1
2005	2	新竹縣	北埔鄉	M	0	70+	10004	10004090	1
2005	2	新竹縣	尖石鄉	M	0	35~39	10004	10004120	1
2005	2	新竹縣	尖石鄉	M	0	40~44	10004	10004120	1
2005	2	新竹縣	峨眉鄉	M	0	70+	10004	10004110	1
2005	2	新竹縣	湖口鄉	M	0	70+	10004	10004050	3
2005	2	新竹縣	竹北市	F	0	20~24	10004	10004010	1
2005	2	新竹縣	竹北市	M	0	50~54	10004	10004010	1
2005	2	新竹縣	竹東鎮	F	0	15~19	10004	10004020	1
2005	2	新竹縣	竹東鎮	M	0	30~34	10004	10004020	1
2005	2	新竹縣	竹東鎮	M	0	70+	10004	10004020	1
2005	2	新竹縣	芎林鄉	M	0	50~54	10004	10004070	1
2005	2	新竹縣	關西鎮	M	0	5~9	10004	10004040	1
2005	2	新竹縣	關西鎮	M	0	60~64	10004	10004040	1
2005	2	苗栗縣	公館鄉	F	0	20~24	10005	10005090	1
2005	2	苗栗縣	公館鄉	F	0	30~34	10005	10005090	1
2005	2	苗栗縣	公館鄉	M	0	35~39	10005	10005090	1
2005	2	苗栗縣	卓蘭鎮	F	0	70+	10005	10005070	1
2005	2	苗栗縣	南庄鄉	M	0	65~69	10005	10005110	1
2005	2	苗栗縣	後龍鎮	M	0	15~19	10005	10005060	1
2005	2	苗栗縣	後龍鎮	M	0	45~49	10005	10005060	1
2005	2	苗栗縣	後龍鎮	M	0	70+	10005	10005060	1
2005	2	苗栗縣	獅潭鄉	F	0	70+	10005	10005170	1
2005	2	苗栗縣	竹南鎮	M	0	70+	10005	10005040	1
2005	2	苗栗縣	苑裡鎮	M	0	70+	10005	10005020	1
2005	2	苗栗縣	苗栗市	M	0	70+	10005	10005010	2
2005	2	苗栗縣	通霄鎮	M	0	45~49	10005	10005030	1
2005	2	苗栗縣	通霄鎮	M	0	60~64	10005	10005030	1
2005	2	苗栗縣	通霄鎮	M	0	70+	10005	10005030	3
2005	2	苗栗縣	造橋鄉	M	0	50~54	10005	10005150	1
2005	2	苗栗縣	頭份市	F	0	45~49	10005	10005050	1
2005	2	苗栗縣	頭份市	M	0	55~59	10005	10005050	1
2005	2	苗栗縣	頭份市	M	0	65~69	10005	10005050	1
2005	2	苗栗縣	頭份市	M	0	70+	10005	10005050	1
2005	2	彰化縣	二林鎮	M	0	5~9	10007	10007200	1
2005	2	彰化縣	二林鎮	F	0	70+	10007	10007200	3
2005	2	彰化縣	二林鎮	M	0	70+	10007	10007200	3
2005	2	彰化縣	二水鄉	M	0	70+	10007	10007180	1
2005	2	彰化縣	伸港鄉	F	0	70+	10007	10007050	1
2005	2	彰化縣	其他	F	0	70+	10007	10007999	1
2005	2	彰化縣	其他	M	0	70+	10007	10007999	2
2005	2	彰化縣	北斗鎮	M	0	70+	10007	10007190	1
2005	2	彰化縣	和美鎮	M	0	55~59	10007	10007030	1
2005	2	彰化縣	和美鎮	F	0	70+	10007	10007030	1
2005	2	彰化縣	和美鎮	M	0	70+	10007	10007030	1
2005	2	彰化縣	員林市	M	0	65~69	10007	10007100	1
2005	2	彰化縣	員林市	F	0	70+	10007	10007100	1
2005	2	彰化縣	員林市	M	0	70+	10007	10007100	3
2005	2	彰化縣	埔心鄉	F	0	30~34	10007	10007150	1
2005	2	彰化縣	埔心鄉	M	0	40~44	10007	10007150	1
2005	2	彰化縣	埔心鄉	F	0	50~54	10007	10007150	1
2005	2	彰化縣	埔心鄉	M	0	65~69	10007	10007150	1
2005	2	彰化縣	埔鹽鄉	F	0	70+	10007	10007140	1
2005	2	彰化縣	埤頭鄉	M	0	30~34	10007	10007220	1
2005	2	彰化縣	埤頭鄉	F	0	70+	10007	10007220	1
2005	2	彰化縣	大城鄉	M	0	25~29	10007	10007240	1
2005	2	彰化縣	大城鄉	M	0	45~49	10007	10007240	1
2005	2	彰化縣	大城鄉	M	0	70+	10007	10007240	1
2005	2	彰化縣	大村鄉	M	0	30~34	10007	10007130	1
2005	2	彰化縣	大村鄉	M	0	50~54	10007	10007130	1
2005	2	彰化縣	大村鄉	F	0	70+	10007	10007130	1
2005	2	彰化縣	彰化市	M	0	15~19	10007	10007010	1
2005	2	彰化縣	彰化市	F	0	30~34	10007	10007010	1
2005	2	彰化縣	彰化市	M	0	50~54	10007	10007010	1
2005	2	彰化縣	彰化市	M	0	60~64	10007	10007010	1
2005	2	彰化縣	彰化市	M	0	65~69	10007	10007010	1
2005	2	彰化縣	彰化市	F	0	70+	10007	10007010	1
2005	2	彰化縣	彰化市	M	0	70+	10007	10007010	9
2005	2	彰化縣	永靖鄉	F	0	70+	10007	10007160	2
2005	2	彰化縣	溪州鄉	M	0	35~39	10007	10007260	1
2005	2	彰化縣	溪州鄉	F	0	70+	10007	10007260	1
2005	2	彰化縣	溪州鄉	M	0	70+	10007	10007260	3
2005	2	彰化縣	溪湖鎮	F	0	70+	10007	10007110	2
2005	2	彰化縣	溪湖鎮	M	0	70+	10007	10007110	1
2005	2	彰化縣	田中鎮	M	0	20~24	10007	10007120	1
2005	2	彰化縣	田中鎮	M	0	70+	10007	10007120	2
2005	2	彰化縣	田尾鄉	M	0	60~64	10007	10007210	1
2005	2	彰化縣	社頭鄉	M	0	40~44	10007	10007170	1
2005	2	彰化縣	社頭鄉	M	0	45~49	10007	10007170	1
2005	2	彰化縣	社頭鄉	M	0	65~69	10007	10007170	1
2005	2	彰化縣	社頭鄉	F	0	70+	10007	10007170	1
2005	2	彰化縣	社頭鄉	M	0	70+	10007	10007170	1
2005	2	彰化縣	福興鄉	M	0	65~69	10007	10007060	1
2005	2	彰化縣	福興鄉	M	0	70+	10007	10007060	3
2005	2	彰化縣	秀水鄉	M	0	50~54	10007	10007070	1
2005	2	彰化縣	秀水鄉	F	0	70+	10007	10007070	1
2005	2	彰化縣	秀水鄉	M	0	70+	10007	10007070	4
2005	2	彰化縣	竹塘鄉	F	0	70+	10007	10007250	1
2005	2	彰化縣	線西鄉	M	0	15~19	10007	10007040	1
2005	2	彰化縣	芬園鄉	M	0	70+	10007	10007090	1
2005	2	彰化縣	花壇鄉	M	0	55~59	10007	10007080	1
2005	2	彰化縣	花壇鄉	M	0	65~69	10007	10007080	1
2005	2	彰化縣	花壇鄉	M	0	70+	10007	10007080	1
2005	2	彰化縣	芳苑鄉	M	0	30~34	10007	10007230	1
2005	2	彰化縣	芳苑鄉	F	0	70+	10007	10007230	1
2005	2	彰化縣	芳苑鄉	M	0	70+	10007	10007230	2
2005	2	彰化縣	鹿港鎮	F	0	15~19	10007	10007020	1
2005	2	彰化縣	鹿港鎮	F	0	55~59	10007	10007020	1
2005	2	彰化縣	鹿港鎮	M	0	65~69	10007	10007020	1
2005	2	彰化縣	鹿港鎮	M	0	70+	10007	10007020	1
2005	2	南投縣	中寮鄉	M	0	65~69	10008	10008080	1
2005	2	南投縣	中寮鄉	M	0	70+	10008	10008080	1
2005	2	南投縣	仁愛鄉	M	0	45~49	10008	10008130	1
2005	2	南投縣	仁愛鄉	F	0	50~54	10008	10008130	1
2005	2	南投縣	仁愛鄉	F	0	55~59	10008	10008130	1
2005	2	南投縣	信義鄉	M	0	40~44	10008	10008120	1
2005	2	南投縣	信義鄉	M	0	45~49	10008	10008120	1
2005	2	南投縣	南投市	M	0	35~39	10008	10008010	1
2005	2	南投縣	南投市	M	0	40~44	10008	10008010	1
2005	2	南投縣	南投市	F	0	45~49	10008	10008010	1
2005	2	南投縣	南投市	M	0	60~64	10008	10008010	1
2005	2	南投縣	南投市	M	0	70+	10008	10008010	3
2005	2	南投縣	名間鄉	M	0	70+	10008	10008060	1
2005	2	南投縣	埔里鎮	M	0	40~44	10008	10008020	1
2005	2	南投縣	埔里鎮	M	0	45~49	10008	10008020	1
2005	2	南投縣	埔里鎮	M	0	50~54	10008	10008020	1
2005	2	南投縣	埔里鎮	F	0	70+	10008	10008020	2
2005	2	南投縣	埔里鎮	M	0	70+	10008	10008020	1
2005	2	南投縣	水里鄉	M	0	70+	10008	10008110	2
2005	2	南投縣	竹山鎮	F	0	70+	10008	10008040	1
2005	2	南投縣	竹山鎮	M	0	70+	10008	10008040	1
2005	2	南投縣	草屯鎮	M	0	30~34	10008	10008030	1
2005	2	南投縣	草屯鎮	M	0	65~69	10008	10008030	1
2005	2	南投縣	草屯鎮	F	0	70+	10008	10008030	1
2005	2	南投縣	草屯鎮	M	0	70+	10008	10008030	1
2005	2	南投縣	集集鎮	F	0	65~69	10008	10008050	1
2005	2	南投縣	魚池鄉	M	0	70+	10008	10008090	1
2005	2	雲林縣	二崙鄉	M	0	5~9	10009	10009110	1
2005	2	雲林縣	二崙鄉	M	0	60~64	10009	10009110	1
2005	2	雲林縣	二崙鄉	M	0	65~69	10009	10009110	1
2005	2	雲林縣	二崙鄉	F	0	70+	10009	10009110	1
2005	2	雲林縣	二崙鄉	M	0	70+	10009	10009110	1
2005	2	雲林縣	元長鄉	M	0	65~69	10009	10009170	1
2005	2	雲林縣	元長鄉	F	0	70+	10009	10009170	1
2005	2	雲林縣	元長鄉	M	0	70+	10009	10009170	2
2005	2	雲林縣	北港鎮	F	0	15~19	10009	10009060	1
2005	2	雲林縣	北港鎮	M	0	40~44	10009	10009060	1
2005	2	雲林縣	北港鎮	M	0	70+	10009	10009060	1
2005	2	雲林縣	口湖鄉	M	0	55~59	10009	10009190	1
2005	2	雲林縣	口湖鄉	M	0	70+	10009	10009190	1
2005	2	雲林縣	古坑鄉	M	0	65~69	10009	10009070	1
2005	2	雲林縣	古坑鄉	M	0	70+	10009	10009070	2
2005	2	雲林縣	台西鄉	M	0	55~59	10009	10009160	1
2005	2	雲林縣	台西鄉	M	0	65~69	10009	10009160	1
2005	2	雲林縣	台西鄉	F	0	70+	10009	10009160	1
2005	2	雲林縣	台西鄉	M	0	70+	10009	10009160	2
2005	2	雲林縣	四湖鄉	F	0	50~54	10009	10009180	1
2005	2	雲林縣	四湖鄉	M	0	70+	10009	10009180	1
2005	2	雲林縣	土庫鎮	F	0	55~59	10009	10009050	1
2005	2	雲林縣	崙背鄉	M	0	15~19	10009	10009120	1
2005	2	雲林縣	崙背鄉	M	0	70+	10009	10009120	2
2005	2	雲林縣	斗六市	M	0	20~24	10009	10009010	2
2005	2	雲林縣	斗六市	M	0	55~59	10009	10009010	1
2005	2	雲林縣	斗六市	F	0	70+	10009	10009010	2
2005	2	雲林縣	斗六市	M	0	70+	10009	10009010	2
2005	2	雲林縣	斗南鎮	M	0	65~69	10009	10009020	1
2005	2	雲林縣	東勢鄉	F	0	65~69	10009	10009140	1
2005	2	雲林縣	東勢鄉	M	0	70+	10009	10009140	1
2005	2	雲林縣	林內鄉	M	0	65~69	10009	10009100	1
2005	2	雲林縣	水林鄉	M	0	70+	10009	10009200	1
2005	2	雲林縣	莿桐鄉	M	0	70+	10009	10009090	2
2005	2	雲林縣	虎尾鎮	F	0	25~29	10009	10009030	1
2005	2	雲林縣	虎尾鎮	M	0	55~59	10009	10009030	1
2005	2	雲林縣	褒忠鄉	M	0	55~59	10009	10009150	1
2005	2	雲林縣	褒忠鄉	M	0	60~64	10009	10009150	1
2005	2	雲林縣	褒忠鄉	F	0	70+	10009	10009150	1
2005	2	雲林縣	褒忠鄉	M	0	70+	10009	10009150	1
2005	2	雲林縣	麥寮鄉	M	0	60~64	10009	10009130	1
2005	2	嘉義縣	中埔鄉	M	0	70+	10010	10010130	1
2005	2	嘉義縣	六腳鄉	F	0	70+	10010	10010080	1
2005	2	嘉義縣	六腳鄉	M	0	70+	10010	10010080	1
2005	2	嘉義縣	大林鎮	F	0	70+	10010	10010040	1
2005	2	嘉義縣	太保市	M	0	65~69	10010	10010010	1
2005	2	嘉義縣	布袋鎮	F	0	70+	10010	10010030	1
2005	2	嘉義縣	新港鄉	M	0	60~64	10010	10010070	1
2005	2	嘉義縣	新港鄉	F	0	70+	10010	10010070	1
2005	2	嘉義縣	朴子市	M	0	65~69	10010	10010020	1
2005	2	嘉義縣	朴子市	F	0	70+	10010	10010020	1
2005	2	嘉義縣	朴子市	M	0	70+	10010	10010020	3
2005	2	嘉義縣	東石鄉	M	0	60~64	10010	10010090	1
2005	2	嘉義縣	梅山鄉	F	0	65~69	10010	10010150	1
2005	2	嘉義縣	民雄鄉	F	0	45~49	10010	10010050	1
2005	2	嘉義縣	民雄鄉	M	0	50~54	10010	10010050	1
2005	2	嘉義縣	民雄鄉	M	0	60~64	10010	10010050	1
2005	2	嘉義縣	民雄鄉	F	0	70+	10010	10010050	1
2005	2	嘉義縣	民雄鄉	M	0	70+	10010	10010050	3
2005	2	嘉義縣	竹崎鄉	M	0	35~39	10010	10010140	1
2005	2	嘉義縣	竹崎鄉	F	0	70+	10010	10010140	1
2005	2	嘉義縣	竹崎鄉	M	0	70+	10010	10010140	4
2005	2	嘉義縣	義竹鄉	M	0	55~59	10010	10010100	1
2005	2	嘉義縣	義竹鄉	M	0	70+	10010	10010100	2
2005	2	嘉義縣	鹿草鄉	M	0	55~59	10010	10010110	1
2005	2	嘉義縣	鹿草鄉	M	0	70+	10010	10010110	1
2005	2	屏東縣	三地門鄉	F	0	40~44	10013	10013260	1
2005	2	屏東縣	九如鄉	M	0	70+	10013	10013080	1
2005	2	屏東縣	佳冬鄉	F	0	50~54	10013	10013210	1
2005	2	屏東縣	佳冬鄉	M	0	70+	10013	10013210	1
2005	2	屏東縣	內埔鄉	F	0	40~44	10013	10013130	1
2005	2	屏東縣	內埔鄉	F	0	65~69	10013	10013130	1
2005	2	屏東縣	內埔鄉	M	0	70+	10013	10013130	1
2005	2	屏東縣	南州鄉	M	0	30~34	10013	10013200	1
2005	2	屏東縣	屏東市	F	0	15~19	10013	10013010	1
2005	2	屏東縣	屏東市	F	0	20~24	10013	10013010	1
2005	2	屏東縣	屏東市	F	0	35~39	10013	10013010	1
2005	2	屏東縣	屏東市	M	0	50~54	10013	10013010	1
2005	2	屏東縣	屏東市	F	0	65~69	10013	10013010	2
2005	2	屏東縣	屏東市	M	0	65~69	10013	10013010	1
2005	2	屏東縣	屏東市	F	0	70+	10013	10013010	1
2005	2	屏東縣	屏東市	M	0	70+	10013	10013010	4
2005	2	屏東縣	崁頂鄉	F	0	70+	10013	10013180	1
2005	2	屏東縣	新園鄉	F	0	20~24	10013	10013170	1
2005	2	屏東縣	新園鄉	F	0	30~34	10013	10013170	1
2005	2	屏東縣	新埤鄉	F	0	50~54	10013	10013150	1
2005	2	屏東縣	新埤鄉	M	0	70+	10013	10013150	1
2005	2	屏東縣	春日鄉	F	0	70+	10013	10013310	1
2005	2	屏東縣	東港鎮	M	0	50~54	10013	10013030	1
2005	2	屏東縣	枋山鄉	M	0	40~44	10013	10013250	1
2005	2	屏東縣	林邊鄉	M	0	55~59	10013	10013190	1
2005	2	屏東縣	潮州鎮	F	0	25~29	10013	10013020	1
2005	2	屏東縣	潮州鎮	M	0	60~64	10013	10013020	1
2005	2	屏東縣	潮州鎮	F	0	70+	10013	10013020	2
2005	2	屏東縣	潮州鎮	M	0	70+	10013	10013020	1
2005	2	屏東縣	牡丹鄉	M	0	40~44	10013	10013330	1
2005	2	屏東縣	牡丹鄉	F	0	65~69	10013	10013330	1
2005	2	屏東縣	竹田鄉	F	0	70+	10013	10013140	1
2005	2	屏東縣	萬丹鄉	M	0	40~44	10013	10013050	1
2005	2	屏東縣	萬丹鄉	M	0	70+	10013	10013050	3
2005	2	屏東縣	萬巒鄉	F	0	70+	10013	10013120	1
2005	2	屏東縣	萬巒鄉	M	0	70+	10013	10013120	1
2005	2	屏東縣	里港鄉	M	0	60~64	10013	10013090	1
2005	2	屏東縣	里港鄉	M	0	70+	10013	10013090	1
2005	2	屏東縣	長治鄉	M	0	40~44	10013	10013060	1
2005	2	屏東縣	長治鄉	M	0	65~69	10013	10013060	2
2005	2	屏東縣	長治鄉	F	0	70+	10013	10013060	1
2005	2	屏東縣	長治鄉	M	0	70+	10013	10013060	1
2005	2	屏東縣	鹽埔鄉	M	0	20~24	10013	10013100	1
2005	2	屏東縣	鹽埔鄉	M	0	60~64	10013	10013100	1
2005	2	屏東縣	鹽埔鄉	F	0	70+	10013	10013100	1
2005	2	屏東縣	鹽埔鄉	M	0	70+	10013	10013100	1
2005	2	屏東縣	麟洛鄉	M	0	70+	10013	10013070	1
2005	2	台東縣	卑南鄉	F	0	70+	10014	10014040	1
2005	2	台東縣	台東市	F	0	25~29	10014	10014010	1
2005	2	台東縣	台東市	M	0	50~54	10014	10014010	1
2005	2	台東縣	台東市	M	0	55~59	10014	10014010	1
2005	2	台東縣	台東市	F	0	60~64	10014	10014010	1
2005	2	台東縣	台東市	M	0	65~69	10014	10014010	1
2005	2	台東縣	台東市	M	0	70+	10014	10014010	1
2005	2	台東縣	大武鄉	F	0	65~69	10014	10014100	1
2005	2	台東縣	延平鄉	M	0	50~54	10014	10014130	1
2005	2	台東縣	成功鎮	M	0	35~39	10014	10014020	1
2005	2	台東縣	池上鄉	M	0	70+	10014	10014060	1
2005	2	台東縣	達仁鄉	M	0	1	10014	10014150	1
2005	2	台東縣	金峰鄉	M	0	50~54	10014	10014140	1
2005	2	台東縣	長濱鄉	M	0	70+	10014	10014080	1
2005	2	台東縣	關山鎮	F	0	70+	10014	10014030	1
2005	2	花蓮縣	卓溪鄉	M	0	20~24	10015	10015130	1
2005	2	花蓮縣	卓溪鄉	M	0	35~39	10015	10015130	1
2005	2	花蓮縣	卓溪鄉	F	0	55~59	10015	10015130	1
2005	2	花蓮縣	卓溪鄉	F	0	60~64	10015	10015130	1
2005	2	花蓮縣	吉安鄉	F	0	45~49	10015	10015050	1
2005	2	花蓮縣	新城鄉	M	0	70+	10015	10015040	1
2005	2	花蓮縣	玉里鎮	M	0	40~44	10015	10015030	1
2005	2	花蓮縣	玉里鎮	M	0	65~69	10015	10015030	2
2005	2	花蓮縣	玉里鎮	F	0	70+	10015	10015030	1
2005	2	花蓮縣	玉里鎮	M	0	70+	10015	10015030	3
2005	2	花蓮縣	秀林鄉	M	0	15~19	10015	10015110	2
2005	2	花蓮縣	秀林鄉	F	0	20~24	10015	10015110	2
2005	2	花蓮縣	秀林鄉	M	0	25~29	10015	10015110	1
2005	2	花蓮縣	秀林鄉	F	0	40~44	10015	10015110	1
2005	2	花蓮縣	秀林鄉	M	0	40~44	10015	10015110	1
2005	2	花蓮縣	秀林鄉	M	0	70+	10015	10015110	1
2005	2	花蓮縣	花蓮市	M	0	35~39	10015	10015010	2
2005	2	花蓮縣	花蓮市	F	0	45~49	10015	10015010	1
2005	2	花蓮縣	花蓮市	M	0	45~49	10015	10015010	1
2005	2	花蓮縣	花蓮市	M	0	70+	10015	10015010	2
2005	2	花蓮縣	萬榮鄉	F	0	20~24	10015	10015120	1
2005	2	澎湖縣	馬公市	F	0	50~54	10016	10016010	1
2005	2	基隆市	七堵區	M	0	20~24	10017	10017020	1
2005	2	基隆市	七堵區	M	0	55~59	10017	10017020	1
2005	2	基隆市	中山區	M	0	20~24	10017	10017050	1
2005	2	基隆市	中山區	F	0	70+	10017	10017050	1
2005	2	基隆市	中正區	F	0	60~64	10017	10017010	1
2005	2	基隆市	仁愛區	M	0	55~59	10017	10017040	1
2005	2	基隆市	仁愛區	M	0	65~69	10017	10017040	1
2005	2	基隆市	仁愛區	M	0	70+	10017	10017040	1
2005	2	基隆市	信義區	M	0	70+	10017	10017070	3
2005	2	基隆市	安樂區	F	0	25~29	10017	10017060	1
2005	2	基隆市	安樂區	M	0	25~29	10017	10017060	1
2005	2	基隆市	安樂區	M	0	30~34	10017	10017060	1
2005	2	基隆市	安樂區	M	0	55~59	10017	10017060	1
2005	2	基隆市	安樂區	M	0	70+	10017	10017060	3
2005	2	基隆市	暖暖區	M	0	40~44	10017	10017030	1
2005	2	新竹市	北區	M	0	30~34	10018	10018020	1
2005	2	新竹市	北區	F	0	50~54	10018	10018020	1
2005	2	新竹市	北區	M	0	50~54	10018	10018020	2
2005	2	新竹市	北區	M	0	55~59	10018	10018020	1
2005	2	新竹市	北區	F	0	65~69	10018	10018020	1
2005	2	新竹市	北區	M	0	70+	10018	10018020	1
2005	2	新竹市	東區	M	0	35~39	10018	10018010	1
2005	2	新竹市	東區	F	0	45~49	10018	10018010	1
2005	2	新竹市	東區	M	0	50~54	10018	10018010	1
2005	2	新竹市	東區	F	0	55~59	10018	10018010	1
2005	2	新竹市	東區	M	0	65~69	10018	10018010	1
2005	2	新竹市	東區	M	0	70+	10018	10018010	1
2005	2	新竹市	香山區	M	0	40~44	10018	10018030	1
2005	2	新竹市	香山區	M	0	50~54	10018	10018030	1
2005	2	嘉義市	東區	M	0	65~69	10020	10020010	1
2005	2	嘉義市	東區	F	0	70+	10020	10020010	1
2005	2	嘉義市	東區	M	0	70+	10020	10020010	2
2005	2	嘉義市	西區	M	0	35~39	10020	10020020	1
2005	2	嘉義市	西區	M	0	50~54	10020	10020020	1
2005	2	嘉義市	西區	M	0	65~69	10020	10020020	2
2005	2	嘉義市	西區	M	0	70+	10020	10020020	3
2005	2	台北市	中山區	M	0	30~34	63000	63000040	2
2005	2	台北市	中山區	M	0	45~49	63000	63000040	2
2005	2	台北市	中山區	M	0	60~64	63000	63000040	1
2005	2	台北市	中山區	M	0	70+	63000	63000040	1
2005	2	台北市	中正區	M	0	20~24	63000	63000050	1
2005	2	台北市	中正區	F	0	25~29	63000	63000050	1
2005	2	台北市	中正區	M	0	65~69	63000	63000050	1
2005	2	台北市	中正區	F	0	70+	63000	63000050	1
2005	2	台北市	中正區	M	0	70+	63000	63000050	4
2005	2	台北市	信義區	M	0	35~39	63000	63000020	1
2005	2	台北市	信義區	M	0	50~54	63000	63000020	1
2005	2	台北市	信義區	F	0	60~64	63000	63000020	1
2005	2	台北市	信義區	F	0	65~69	63000	63000020	2
2005	2	台北市	信義區	F	0	70+	63000	63000020	1
2005	2	台北市	信義區	M	0	70+	63000	63000020	5
2005	2	台北市	內湖區	F	0	35~39	63000	63000100	1
2005	2	台北市	內湖區	M	0	35~39	63000	63000100	1
2005	2	台北市	內湖區	F	0	65~69	63000	63000100	1
2005	2	台北市	內湖區	M	0	65~69	63000	63000100	1
2005	2	台北市	內湖區	M	0	70+	63000	63000100	2
2005	2	台北市	北投區	M	0	30~34	63000	63000120	1
2005	2	台北市	北投區	M	0	45~49	63000	63000120	2
2005	2	台北市	北投區	F	0	50~54	63000	63000120	1
2005	2	台北市	北投區	M	0	60~64	63000	63000120	1
2005	2	台北市	北投區	F	0	70+	63000	63000120	1
2005	2	台北市	北投區	M	0	70+	63000	63000120	4
2005	2	台北市	南港區	M	0	40~44	63000	63000090	1
2005	2	台北市	南港區	M	0	50~54	63000	63000090	1
2005	2	台北市	南港區	M	0	65~69	63000	63000090	1
2005	2	台北市	南港區	M	0	70+	63000	63000090	1
2005	2	台北市	士林區	M	0	20~24	63000	63000110	1
2005	2	台北市	士林區	M	0	35~39	63000	63000110	1
2005	2	台北市	士林區	F	0	45~49	63000	63000110	1
2005	2	台北市	士林區	F	0	50~54	63000	63000110	1
2005	2	台北市	士林區	M	0	50~54	63000	63000110	2
2005	2	台北市	士林區	M	0	55~59	63000	63000110	1
2005	2	台北市	士林區	M	0	60~64	63000	63000110	3
2005	2	台北市	士林區	M	0	65~69	63000	63000110	1
2005	2	台北市	士林區	F	0	70+	63000	63000110	1
2005	2	台北市	士林區	M	0	70+	63000	63000110	4
2005	2	台北市	大同區	M	0	25~29	63000	63000060	1
2005	2	台北市	大同區	F	0	45~49	63000	63000060	1
2005	2	台北市	大同區	M	0	45~49	63000	63000060	1
2005	2	台北市	大同區	M	0	70+	63000	63000060	1
2005	2	台北市	大安區	F	0	50~54	63000	63000030	1
2005	2	台北市	大安區	M	0	55~59	63000	63000030	1
2005	2	台北市	大安區	F	0	60~64	63000	63000030	1
2005	2	台北市	大安區	F	0	70+	63000	63000030	1
2005	2	台北市	大安區	M	0	70+	63000	63000030	5
2005	2	台北市	文山區	M	0	15~19	63000	63000080	1
2005	2	台北市	文山區	M	0	30~34	63000	63000080	1
2005	2	台北市	文山區	F	0	35~39	63000	63000080	1
2005	2	台北市	文山區	M	0	35~39	63000	63000080	1
2005	2	台北市	文山區	F	0	45~49	63000	63000080	2
2005	2	台北市	文山區	M	0	45~49	63000	63000080	1
2005	2	台北市	文山區	M	0	50~54	63000	63000080	1
2005	2	台北市	文山區	M	0	55~59	63000	63000080	1
2005	2	台北市	文山區	M	0	60~64	63000	63000080	2
2005	2	台北市	文山區	M	0	70+	63000	63000080	4
2005	2	台北市	松山區	F	0	25~29	63000	63000010	1
2005	2	台北市	松山區	M	0	40~44	63000	63000010	1
2005	2	台北市	松山區	F	0	55~59	63000	63000010	1
2005	2	台北市	松山區	M	0	65~69	63000	63000010	1
2005	2	台北市	松山區	M	0	70+	63000	63000010	4
2005	2	台北市	萬華區	M	0	40~44	63000	63000070	2
2005	2	台北市	萬華區	F	0	60~64	63000	63000070	1
2005	2	台北市	萬華區	M	0	60~64	63000	63000070	1
2005	2	台北市	萬華區	M	0	65~69	63000	63000070	2
2005	2	台北市	萬華區	M	0	70+	63000	63000070	4
2005	2	高雄市	三民區	F	0	30~34	64000	64000050	1
2005	2	高雄市	三民區	F	0	40~44	64000	64000050	1
2005	2	高雄市	三民區	M	0	40~44	64000	64000050	1
2005	2	高雄市	三民區	F	0	45~49	64000	64000050	2
2005	2	高雄市	三民區	F	0	55~59	64000	64000050	1
2005	2	高雄市	三民區	M	0	55~59	64000	64000050	1
2005	2	高雄市	三民區	F	0	65~69	64000	64000050	1
2005	2	高雄市	三民區	M	0	65~69	64000	64000050	1
2005	2	高雄市	三民區	F	0	70+	64000	64000050	3
2005	2	高雄市	三民區	M	0	70+	64000	64000050	1
2005	2	高雄市	仁武區	M	0	55~59	64000	64000170	1
2005	2	高雄市	仁武區	M	0	65~69	64000	64000170	1
2005	2	高雄市	內門區	M	0	60~64	64000	64000350	1
2005	2	高雄市	六龜區	M	0	30~34	64000	64000320	1
2005	2	高雄市	六龜區	F	0	70+	64000	64000320	2
2005	2	高雄市	前金區	M	0	55~59	64000	64000070	2
2005	2	高雄市	前金區	M	0	60~64	64000	64000070	1
2005	2	高雄市	前金區	M	0	70+	64000	64000070	2
2005	2	高雄市	前鎮區	F	0	30~34	64000	64000090	1
2005	2	高雄市	前鎮區	M	0	40~44	64000	64000090	1
2005	2	高雄市	前鎮區	M	0	50~54	64000	64000090	2
2005	2	高雄市	前鎮區	F	0	60~64	64000	64000090	1
2005	2	高雄市	前鎮區	M	0	60~64	64000	64000090	2
2005	2	高雄市	前鎮區	F	0	65~69	64000	64000090	1
2005	2	高雄市	前鎮區	M	0	65~69	64000	64000090	2
2005	2	高雄市	前鎮區	F	0	70+	64000	64000090	1
2005	2	高雄市	前鎮區	M	0	70+	64000	64000090	2
2005	2	高雄市	大寮區	M	0	40~44	64000	64000140	1
2005	2	高雄市	大寮區	M	0	45~49	64000	64000140	2
2005	2	高雄市	大寮區	M	0	50~54	64000	64000140	2
2005	2	高雄市	大寮區	F	0	70+	64000	64000140	1
2005	2	高雄市	大寮區	M	0	70+	64000	64000140	5
2005	2	高雄市	大樹區	M	0	20~24	64000	64000150	1
2005	2	高雄市	大樹區	M	0	55~59	64000	64000150	1
2005	2	高雄市	大樹區	M	0	60~64	64000	64000150	1
2005	2	高雄市	大樹區	M	0	70+	64000	64000150	1
2005	2	高雄市	大社區	M	0	30~34	64000	64000160	2
2005	2	高雄市	大社區	M	0	65~69	64000	64000160	1
2005	2	高雄市	小港區	M	0	30~34	64000	64000110	1
2005	2	高雄市	小港區	F	0	50~54	64000	64000110	1
2005	2	高雄市	小港區	M	0	55~59	64000	64000110	1
2005	2	高雄市	小港區	M	0	70+	64000	64000110	1
2005	2	高雄市	岡山區	M	0	60~64	64000	64000190	1
2005	2	高雄市	岡山區	M	0	65~69	64000	64000190	2
2005	2	高雄市	岡山區	F	0	70+	64000	64000190	1
2005	2	高雄市	左營區	F	0	25~29	64000	64000030	1
2005	2	高雄市	左營區	F	0	35~39	64000	64000030	1
2005	2	高雄市	左營區	M	0	40~44	64000	64000030	1
2005	2	高雄市	左營區	F	0	50~54	64000	64000030	1
2005	2	高雄市	左營區	M	0	50~54	64000	64000030	1
2005	2	高雄市	左營區	M	0	65~69	64000	64000030	1
2005	2	高雄市	左營區	F	0	70+	64000	64000030	1
2005	2	高雄市	左營區	M	0	70+	64000	64000030	2
2005	2	高雄市	彌陀區	M	0	45~49	64000	64000280	1
2005	2	高雄市	旗山區	M	0	50~54	64000	64000300	1
2005	2	高雄市	旗山區	M	0	70+	64000	64000300	1
2005	2	高雄市	林園區	F	0	40~44	64000	64000130	1
2005	2	高雄市	林園區	M	0	40~44	64000	64000130	2
2005	2	高雄市	林園區	M	0	45~49	64000	64000130	1
2005	2	高雄市	林園區	M	0	70+	64000	64000130	2
2005	2	高雄市	桃源區	F	0	45~49	64000	64000370	1
2005	2	高雄市	桃源區	M	0	45~49	64000	64000370	1
2005	2	高雄市	梓官區	M	0	15~19	64000	64000290	1
2005	2	高雄市	梓官區	F	0	3	64000	64000290	1
2005	2	高雄市	楠梓區	F	0	25~29	64000	64000040	1
2005	2	高雄市	楠梓區	M	0	25~29	64000	64000040	2
2005	2	高雄市	楠梓區	M	0	35~39	64000	64000040	1
2005	2	高雄市	楠梓區	M	0	50~54	64000	64000040	1
2005	2	高雄市	楠梓區	F	0	55~59	64000	64000040	1
2005	2	高雄市	楠梓區	M	0	55~59	64000	64000040	1
2005	2	高雄市	楠梓區	M	0	70+	64000	64000040	3
2005	2	高雄市	橋頭區	M	0	70+	64000	64000200	1
2005	2	高雄市	湖內區	M	0	55~59	64000	64000250	1
2005	2	高雄市	湖內區	M	0	60~64	64000	64000250	1
2005	2	高雄市	燕巢區	M	0	15~19	64000	64000210	1
2005	2	高雄市	燕巢區	M	0	35~39	64000	64000210	1
2005	2	高雄市	燕巢區	M	0	40~44	64000	64000210	1
2005	2	高雄市	燕巢區	M	0	45~49	64000	64000210	1
2005	2	高雄市	燕巢區	M	0	65~69	64000	64000210	2
2005	2	高雄市	燕巢區	M	0	70+	64000	64000210	3
2005	2	高雄市	田寮區	F	0	70+	64000	64000220	1
2005	2	高雄市	田寮區	M	0	70+	64000	64000220	1
2005	2	高雄市	美濃區	M	0	45~49	64000	64000310	1
2005	2	高雄市	美濃區	M	0	60~64	64000	64000310	1
2005	2	高雄市	美濃區	F	0	70+	64000	64000310	2
2005	2	高雄市	苓雅區	M	0	30~34	64000	64000080	1
2005	2	高雄市	苓雅區	F	0	50~54	64000	64000080	2
2005	2	高雄市	苓雅區	M	0	55~59	64000	64000080	2
2005	2	高雄市	苓雅區	F	0	70+	64000	64000080	1
2005	2	高雄市	苓雅區	M	0	70+	64000	64000080	4
2005	2	高雄市	茂林區	F	0	35~39	64000	64000360	1
2005	2	高雄市	茂林區	M	0	35~39	64000	64000360	1
2005	2	高雄市	路竹區	F	0	70+	64000	64000240	1
2005	2	高雄市	路竹區	M	0	70+	64000	64000240	2
2005	2	高雄市	阿蓮區	F	0	65~69	64000	64000230	1
2005	2	高雄市	阿蓮區	F	0	70+	64000	64000230	1
2005	2	高雄市	鳥松區	M	0	60~64	64000	64000180	1
2005	2	高雄市	鳳山區	M	0	25~29	64000	64000120	1
2005	2	高雄市	鳳山區	M	0	30~34	64000	64000120	1
2005	2	高雄市	鳳山區	M	0	35~39	64000	64000120	1
2005	2	高雄市	鳳山區	F	0	40~44	64000	64000120	1
2005	2	高雄市	鳳山區	M	0	45~49	64000	64000120	1
2005	2	高雄市	鳳山區	F	0	50~54	64000	64000120	1
2005	2	高雄市	鳳山區	F	0	55~59	64000	64000120	1
2005	2	高雄市	鳳山區	F	0	65~69	64000	64000120	1
2005	2	高雄市	鳳山區	M	0	65~69	64000	64000120	2
2005	2	高雄市	鳳山區	F	0	70+	64000	64000120	3
2005	2	高雄市	鳳山區	M	0	70+	64000	64000120	3
2005	2	高雄市	鼓山區	M	0	35~39	64000	64000020	1
2005	2	高雄市	鼓山區	M	0	60~64	64000	64000020	1
2005	2	高雄市	鼓山區	M	0	70+	64000	64000020	1
2005	2	新北市	三峽區	F	0	25~29	65000	65000090	1
2005	2	新北市	三峽區	M	0	30~34	65000	65000090	1
2005	2	新北市	三峽區	F	0	35~39	65000	65000090	1
2005	2	新北市	三峽區	M	0	40~44	65000	65000090	2
2005	2	新北市	三峽區	F	0	50~54	65000	65000090	1
2005	2	新北市	三峽區	F	0	65~69	65000	65000090	1
2005	2	新北市	三峽區	M	0	70+	65000	65000090	2
2005	2	新北市	三芝區	M	0	65~69	65000	65000210	1
2005	2	新北市	三重區	M	0	15~19	65000	65000020	1
2005	2	新北市	三重區	F	0	30~34	65000	65000020	2
2005	2	新北市	三重區	M	0	40~44	65000	65000020	1
2005	2	新北市	三重區	M	0	45~49	65000	65000020	1
2005	2	新北市	三重區	F	0	50~54	65000	65000020	1
2005	2	新北市	三重區	M	0	55~59	65000	65000020	2
2005	2	新北市	三重區	M	0	60~64	65000	65000020	1
2005	2	新北市	三重區	M	0	65~69	65000	65000020	1
2005	2	新北市	三重區	F	0	70+	65000	65000020	2
2005	2	新北市	三重區	M	0	70+	65000	65000020	4
2005	2	新北市	中和區	F	0	20~24	65000	65000030	2
2005	2	新北市	中和區	F	0	40~44	65000	65000030	2
2005	2	新北市	中和區	M	0	40~44	65000	65000030	1
2005	2	新北市	中和區	F	0	45~49	65000	65000030	1
2005	2	新北市	中和區	M	0	45~49	65000	65000030	1
2005	2	新北市	中和區	F	0	50~54	65000	65000030	1
2005	2	新北市	中和區	M	0	50~54	65000	65000030	1
2005	2	新北市	中和區	F	0	65~69	65000	65000030	1
2005	2	新北市	中和區	F	0	70+	65000	65000030	3
2005	2	新北市	中和區	M	0	70+	65000	65000030	5
2005	2	新北市	五股區	M	0	70+	65000	65000150	1
2005	2	新北市	土城區	F	0	20~24	65000	65000130	1
2005	2	新北市	土城區	M	0	25~29	65000	65000130	1
2005	2	新北市	土城區	F	0	40~44	65000	65000130	1
2005	2	新北市	土城區	M	0	40~44	65000	65000130	2
2005	2	新北市	土城區	F	0	50~54	65000	65000130	1
2005	2	新北市	土城區	M	0	50~54	65000	65000130	1
2005	2	新北市	土城區	M	0	55~59	65000	65000130	1
2005	2	新北市	土城區	F	0	60~64	65000	65000130	1
2005	2	新北市	土城區	M	0	70+	65000	65000130	4
2005	2	新北市	平溪區	M	0	35~39	65000	65000240	1
2005	2	新北市	新店區	F	0	20~24	65000	65000060	1
2005	2	新北市	新店區	M	0	45~49	65000	65000060	1
2005	2	新北市	新店區	F	0	50~54	65000	65000060	1
2005	2	新北市	新店區	F	0	70+	65000	65000060	2
2005	2	新北市	新店區	M	0	70+	65000	65000060	3
2005	2	新北市	新莊區	M	0	15~19	65000	65000050	2
2005	2	新北市	新莊區	M	0	20~24	65000	65000050	1
2005	2	新北市	新莊區	M	0	25~29	65000	65000050	1
2005	2	新北市	新莊區	M	0	45~49	65000	65000050	2
2005	2	新北市	新莊區	M	0	50~54	65000	65000050	2
2005	2	新北市	新莊區	M	0	55~59	65000	65000050	1
2005	2	新北市	新莊區	F	0	60~64	65000	65000050	2
2005	2	新北市	新莊區	M	0	65~69	65000	65000050	2
2005	2	新北市	新莊區	F	0	70+	65000	65000050	2
2005	2	新北市	新莊區	M	0	70+	65000	65000050	4
2005	2	新北市	板橋區	M	0	10~14	65000	65000010	1
2005	2	新北市	板橋區	F	0	20~24	65000	65000010	1
2005	2	新北市	板橋區	M	0	20~24	65000	65000010	3
2005	2	新北市	板橋區	M	0	25~29	65000	65000010	1
2005	2	新北市	板橋區	M	0	35~39	65000	65000010	1
2005	2	新北市	板橋區	M	0	40~44	65000	65000010	3
2005	2	新北市	板橋區	F	0	45~49	65000	65000010	1
2005	2	新北市	板橋區	M	0	50~54	65000	65000010	2
2005	2	新北市	板橋區	F	0	55~59	65000	65000010	1
2005	2	新北市	板橋區	F	0	70+	65000	65000010	4
2005	2	新北市	板橋區	M	0	70+	65000	65000010	6
2005	2	新北市	林口區	M	0	25~29	65000	65000170	1
2005	2	新北市	林口區	M	0	65~69	65000	65000170	1
2005	2	新北市	樹林區	F	0	20~24	65000	65000070	1
2005	2	新北市	樹林區	M	0	30~34	65000	65000070	1
2005	2	新北市	樹林區	M	0	35~39	65000	65000070	1
2005	2	新北市	永和區	F	0	40~44	65000	65000040	1
2005	2	新北市	永和區	M	0	40~44	65000	65000040	1
2005	2	新北市	永和區	M	0	45~49	65000	65000040	2
2005	2	新北市	永和區	M	0	50~54	65000	65000040	1
2005	2	新北市	永和區	M	0	55~59	65000	65000040	1
2005	2	新北市	永和區	M	0	60~64	65000	65000040	1
2005	2	新北市	永和區	M	0	65~69	65000	65000040	1
2005	2	新北市	永和區	F	0	70+	65000	65000040	1
2005	2	新北市	永和區	M	0	70+	65000	65000040	3
2005	2	新北市	汐止區	F	0	20~24	65000	65000110	1
2005	2	新北市	汐止區	M	0	25~29	65000	65000110	1
2005	2	新北市	汐止區	M	0	35~39	65000	65000110	3
2005	2	新北市	汐止區	F	0	40~44	65000	65000110	1
2005	2	新北市	汐止區	M	0	50~54	65000	65000110	1
2005	2	新北市	汐止區	F	0	70+	65000	65000110	2
2005	2	新北市	汐止區	M	0	70+	65000	65000110	3
2005	2	新北市	泰山區	F	0	30~34	65000	65000160	1
2005	2	新北市	泰山區	M	0	70+	65000	65000160	2
2005	2	新北市	淡水區	F	0	30~34	65000	65000100	1
2005	2	新北市	淡水區	F	0	45~49	65000	65000100	1
2005	2	新北市	淡水區	M	0	60~64	65000	65000100	1
2005	2	新北市	淡水區	F	0	70+	65000	65000100	1
2005	2	新北市	淡水區	M	0	70+	65000	65000100	3
2005	2	新北市	瑞芳區	M	0	65~69	65000	65000120	1
2005	2	新北市	瑞芳區	M	0	70+	65000	65000120	3
2005	2	新北市	石碇區	F	0	30~34	65000	65000190	1
2005	2	新北市	石門區	M	0	70+	65000	65000220	1
2005	2	新北市	萬里區	F	0	65~69	65000	65000280	1
2005	2	新北市	萬里區	M	0	70+	65000	65000280	2
2005	2	新北市	蘆洲區	F	0	20~24	65000	65000140	1
2005	2	新北市	蘆洲區	F	0	35~39	65000	65000140	1
2005	2	新北市	蘆洲區	M	0	40~44	65000	65000140	1
2005	2	新北市	蘆洲區	M	0	60~64	65000	65000140	1
2005	2	新北市	蘆洲區	F	0	65~69	65000	65000140	2
2005	2	新北市	蘆洲區	F	0	70+	65000	65000140	1
2005	2	新北市	蘆洲區	M	0	70+	65000	65000140	2
2005	2	新北市	鶯歌區	M	0	20~24	65000	65000080	1
2005	2	新北市	鶯歌區	M	0	30~34	65000	65000080	1
2005	2	新北市	鶯歌區	M	0	35~39	65000	65000080	1
2005	2	新北市	鶯歌區	M	0	45~49	65000	65000080	1
2005	2	新北市	鶯歌區	M	0	60~64	65000	65000080	3
2005	2	新北市	鶯歌區	M	0	70+	65000	65000080	1
2005	2	台中市	中區	M	0	50~54	66000	66000010	1
2005	2	台中市	中區	M	0	70+	66000	66000010	1
2005	2	台中市	北區	M	0	30~34	66000	66000050	2
2005	2	台中市	北區	M	0	70+	66000	66000050	6
2005	2	台中市	北屯區	F	0	35~39	66000	66000080	2
2005	2	台中市	北屯區	M	0	40~44	66000	66000080	1
2005	2	台中市	北屯區	M	0	50~54	66000	66000080	1
2005	2	台中市	北屯區	F	0	55~59	66000	66000080	1
2005	2	台中市	北屯區	F	0	70+	66000	66000080	1
2005	2	台中市	北屯區	M	0	70+	66000	66000080	2
2005	2	台中市	南區	M	0	20~24	66000	66000030	1
2005	2	台中市	南區	M	0	60~64	66000	66000030	1
2005	2	台中市	南區	F	0	70+	66000	66000030	1
2005	2	台中市	南屯區	F	0	25~29	66000	66000070	1
2005	2	台中市	南屯區	F	0	50~54	66000	66000070	1
2005	2	台中市	南屯區	F	0	70+	66000	66000070	3
2005	2	台中市	南屯區	M	0	70+	66000	66000070	2
2005	2	台中市	后里區	F	0	25~29	66000	66000150	1
2005	2	台中市	后里區	M	0	55~59	66000	66000150	1
2005	2	台中市	后里區	F	0	70+	66000	66000150	1
2005	2	台中市	后里區	M	0	70+	66000	66000150	1
2005	2	台中市	外埔區	M	0	60~64	66000	66000210	1
2005	2	台中市	外埔區	M	0	70+	66000	66000210	1
2005	2	台中市	大甲區	M	0	50~54	66000	66000110	1
2005	2	台中市	大甲區	M	0	65~69	66000	66000110	1
2005	2	台中市	大甲區	F	0	70+	66000	66000110	3
2005	2	台中市	大肚區	M	0	45~49	66000	66000240	1
2005	2	台中市	大肚區	F	0	65~69	66000	66000240	1
2005	2	台中市	大肚區	M	0	70+	66000	66000240	1
2005	2	台中市	大里區	F	0	25~29	66000	66000280	1
2005	2	台中市	大里區	M	0	45~49	66000	66000280	1
2005	2	台中市	大里區	M	0	60~64	66000	66000280	1
2005	2	台中市	大里區	M	0	65~69	66000	66000280	1
2005	2	台中市	大里區	M	0	70+	66000	66000280	2
2005	2	台中市	大雅區	M	0	30~34	66000	66000180	1
2005	2	台中市	大雅區	M	0	35~39	66000	66000180	1
2005	2	台中市	大雅區	M	0	45~49	66000	66000180	1
2005	2	台中市	大雅區	F	0	50~54	66000	66000180	1
2005	2	台中市	大雅區	F	0	55~59	66000	66000180	1
2005	2	台中市	大雅區	M	0	65~69	66000	66000180	1
2005	2	台中市	大雅區	F	0	70+	66000	66000180	1
2005	2	台中市	大雅區	M	0	70+	66000	66000180	3
2005	2	台中市	太平區	M	0	20~24	66000	66000270	2
2005	2	台中市	太平區	M	0	30~34	66000	66000270	1
2005	2	台中市	太平區	M	0	40~44	66000	66000270	1
2005	2	台中市	太平區	M	0	60~64	66000	66000270	2
2005	2	台中市	太平區	F	0	65~69	66000	66000270	2
2005	2	台中市	太平區	F	0	70+	66000	66000270	2
2005	2	台中市	太平區	M	0	70+	66000	66000270	2
2005	2	台中市	新社區	F	0	70+	66000	66000190	1
2005	2	台中市	新社區	M	0	70+	66000	66000190	1
2005	2	台中市	東勢區	M	0	60~64	66000	66000100	1
2005	2	台中市	梧棲區	M	0	70+	66000	66000140	1
2005	2	台中市	沙鹿區	F	0	70+	66000	66000130	1
2005	2	台中市	清水區	M	0	65~69	66000	66000120	1
2005	2	台中市	清水區	F	0	70+	66000	66000120	2
2005	2	台中市	潭子區	M	0	55~59	66000	66000170	1
2005	2	台中市	烏日區	F	0	20~24	66000	66000230	1
2005	2	台中市	烏日區	M	0	50~54	66000	66000230	1
2005	2	台中市	烏日區	F	0	60~64	66000	66000230	1
2005	2	台中市	烏日區	F	0	65~69	66000	66000230	1
2005	2	台中市	烏日區	M	0	70+	66000	66000230	1
2005	2	台中市	石岡區	F	0	70+	66000	66000200	1
2005	2	台中市	神岡區	M	0	65~69	66000	66000160	1
2005	2	台中市	西區	F	0	60~64	66000	66000040	1
2005	2	台中市	西區	F	0	70+	66000	66000040	2
2005	2	台中市	西區	M	0	70+	66000	66000040	5
2005	2	台中市	西屯區	M	0	35~39	66000	66000060	1
2005	2	台中市	西屯區	M	0	50~54	66000	66000060	1
2005	2	台中市	西屯區	M	0	55~59	66000	66000060	1
2005	2	台中市	豐原區	M	0	60~64	66000	66000090	1
2005	2	台中市	豐原區	F	0	70+	66000	66000090	1
2005	2	台中市	霧峰區	M	0	60~64	66000	66000260	1
2005	2	台中市	霧峰區	M	0	70+	66000	66000260	2
2005	2	台中市	龍井區	M	0	70+	66000	66000250	1
2005	2	台南市	中西區	F	0	40~44	67000	67000370	1
2005	2	台南市	中西區	M	0	40~44	67000	67000370	1
2005	2	台南市	中西區	M	0	50~54	67000	67000370	1
2005	2	台南市	中西區	F	0	70+	67000	67000370	1
2005	2	台南市	中西區	M	0	70+	67000	67000370	1
2005	2	台南市	仁德區	F	0	35~39	67000	67000270	1
2005	2	台南市	仁德區	M	0	55~59	67000	67000270	1
2005	2	台南市	佳里區	F	0	55~59	67000	67000120	2
2005	2	台南市	佳里區	F	0	70+	67000	67000120	1
2005	2	台南市	佳里區	M	0	70+	67000	67000120	1
2005	2	台南市	六甲區	F	0	20~24	67000	67000090	1
2005	2	台南市	六甲區	M	0	70+	67000	67000090	2
2005	2	台南市	北區	M	0	30~34	67000	67000340	1
2005	2	台南市	北區	M	0	40~44	67000	67000340	1
2005	2	台南市	北區	M	0	45~49	67000	67000340	1
2005	2	台南市	北區	F	0	60~64	67000	67000340	1
2005	2	台南市	北區	F	0	65~69	67000	67000340	1
2005	2	台南市	北區	M	0	65~69	67000	67000340	1
2005	2	台南市	北區	F	0	70+	67000	67000340	2
2005	2	台南市	北區	M	0	70+	67000	67000340	2
2005	2	台南市	南區	M	0	50~54	67000	67000330	1
2005	2	台南市	南區	M	0	55~59	67000	67000330	2
2005	2	台南市	南區	F	0	70+	67000	67000330	1
2005	2	台南市	善化區	M	0	25~29	67000	67000190	1
2005	2	台南市	善化區	M	0	70+	67000	67000190	1
2005	2	台南市	大內區	F	0	70+	67000	67000110	1
2005	2	台南市	大內區	M	0	70+	67000	67000110	1
2005	2	台南市	學甲區	M	0	60~64	67000	67000130	1
2005	2	台南市	學甲區	M	0	70+	67000	67000130	1
2005	2	台南市	安南區	F	0	15~19	67000	67000350	1
2005	2	台南市	安南區	F	0	25~29	67000	67000350	1
2005	2	台南市	安南區	F	0	50~54	67000	67000350	1
2005	2	台南市	安南區	M	0	65~69	67000	67000350	2
2005	2	台南市	安南區	F	0	70+	67000	67000350	1
2005	2	台南市	安南區	M	0	70+	67000	67000350	1
2005	2	台南市	安定區	M	0	20~24	67000	67000210	1
2005	2	台南市	安定區	M	0	50~54	67000	67000210	1
2005	2	台南市	安定區	M	0	70+	67000	67000210	1
2005	2	台南市	安平區	M	0	55~59	67000	67000360	1
2005	2	台南市	官田區	F	0	70+	67000	67000100	1
2005	2	台南市	將軍區	F	0	30~34	67000	67000160	1
2005	2	台南市	將軍區	F	0	35~39	67000	67000160	1
2005	2	台南市	將軍區	F	0	70+	67000	67000160	1
2005	2	台南市	山上區	F	0	45~49	67000	67000220	1
2005	2	台南市	新化區	M	0	20~24	67000	67000180	1
2005	2	台南市	新化區	F	0	25~29	67000	67000180	1
2005	2	台南市	新化區	M	0	70+	67000	67000180	1
2005	2	台南市	新營區	M	0	40~44	67000	67000010	1
2005	2	台南市	新營區	M	0	60~64	67000	67000010	1
2005	2	台南市	新營區	F	0	70+	67000	67000010	1
2005	2	台南市	新營區	M	0	70+	67000	67000010	1
2005	2	台南市	東區	F	0	30~34	67000	67000320	1
2005	2	台南市	東區	F	0	45~49	67000	67000320	1
2005	2	台南市	東區	M	0	45~49	67000	67000320	1
2005	2	台南市	東區	M	0	50~54	67000	67000320	1
2005	2	台南市	東區	M	0	70+	67000	67000320	1
2005	2	台南市	東山區	F	0	50~54	67000	67000060	1
2005	2	台南市	柳營區	M	0	70+	67000	67000040	1
2005	2	台南市	楠西區	M	0	60~64	67000	67000240	1
2005	2	台南市	歸仁區	M	0	20~24	67000	67000280	1
2005	2	台南市	歸仁區	M	0	70+	67000	67000280	2
2005	2	台南市	永康區	F	0	40~44	67000	67000310	1
2005	2	台南市	永康區	F	0	60~64	67000	67000310	1
2005	2	台南市	永康區	M	0	70+	67000	67000310	2
2005	2	台南市	西港區	F	0	30~34	67000	67000140	1
2005	2	台南市	龍崎區	F	0	50~54	67000	67000300	1
2005	2	桃園市	中壢區	M	0	20~24	68000	68000020	1
2005	2	桃園市	中壢區	M	0	25~29	68000	68000020	1
2005	2	桃園市	中壢區	M	0	30~34	68000	68000020	1
2005	2	桃園市	中壢區	F	0	45~49	68000	68000020	1
2005	2	桃園市	中壢區	M	0	55~59	68000	68000020	1
2005	2	桃園市	中壢區	F	0	60~64	68000	68000020	1
2005	2	桃園市	中壢區	M	0	60~64	68000	68000020	2
2005	2	桃園市	中壢區	M	0	65~69	68000	68000020	1
2005	2	桃園市	中壢區	M	0	70+	68000	68000020	3
2005	2	桃園市	八德區	F	0	10~14	68000	68000080	1
2005	2	桃園市	八德區	M	0	30~34	68000	68000080	1
2005	2	桃園市	八德區	M	0	65~69	68000	68000080	1
2005	2	桃園市	八德區	F	0	70+	68000	68000080	1
2005	2	桃園市	八德區	M	0	70+	68000	68000080	2
2005	2	桃園市	大園區	M	0	40~44	68000	68000060	1
2005	2	桃園市	大園區	M	0	65~69	68000	68000060	1
2005	2	桃園市	大溪區	F	0	15~19	68000	68000030	1
2005	2	桃園市	大溪區	M	0	65~69	68000	68000030	1
2005	2	桃園市	大溪區	M	0	70+	68000	68000030	3
2005	2	桃園市	平鎮區	M	0	20~24	68000	68000100	1
2005	2	桃園市	平鎮區	M	0	70+	68000	68000100	2
2005	2	桃園市	復興區	F	0	65~69	68000	68000130	1
2005	2	桃園市	桃園區	M	0	20~24	68000	68000010	1
2005	2	桃園市	桃園區	M	0	25~29	68000	68000010	2
2005	2	桃園市	桃園區	F	0	45~49	68000	68000010	1
2005	2	桃園市	桃園區	M	0	45~49	68000	68000010	1
2005	2	桃園市	桃園區	M	0	50~54	68000	68000010	1
2005	2	桃園市	桃園區	M	0	65~69	68000	68000010	1
2005	2	桃園市	桃園區	F	0	70+	68000	68000010	1
2005	2	桃園市	桃園區	M	0	70+	68000	68000010	2
2005	2	桃園市	楊梅區	M	0	40~44	68000	68000040	1
2005	2	桃園市	楊梅區	M	0	45~49	68000	68000040	1
2005	2	桃園市	楊梅區	M	0	60~64	68000	68000040	1
2005	2	桃園市	楊梅區	M	0	65~69	68000	68000040	1
2005	2	桃園市	楊梅區	M	0	70+	68000	68000040	1
2005	2	桃園市	蘆竹區	M	0	40~44	68000	68000050	1
2005	2	桃園市	觀音區	M	0	55~59	68000	68000120	1
2005	2	桃園市	觀音區	M	0	65~69	68000	68000120	1
2005	2	桃園市	龍潭區	M	0	50~54	68000	68000090	1
2005	2	桃園市	龍潭區	M	0	65~69	68000	68000090	1
2005	2	桃園市	龍潭區	F	0	70+	68000	68000090	1
2005	2	桃園市	龜山區	F	0	15~19	68000	68000070	1
2005	2	桃園市	龜山區	F	0	20~24	68000	68000070	2
2005	2	桃園市	龜山區	M	0	20~24	68000	68000070	1
2005	2	桃園市	龜山區	M	0	30~34	68000	68000070	1
2005	2	桃園市	龜山區	M	0	35~39	68000	68000070	1
2005	2	桃園市	龜山區	M	0	50~54	68000	68000070	1
2005	2	桃園市	龜山區	M	0	60~64	68000	68000070	1
2005	2	桃園市	龜山區	M	0	65~69	68000	68000070	1
2005	2	桃園市	龜山區	M	0	70+	68000	68000070	1
2005	3	金門縣	金寧鄉	M	0	45~49	9020	9020040	1
2005	3	金門縣	金湖鎮	M	0	65~69	9020	9020030	1
2005	3	宜蘭縣	三星鄉	M	0	40~44	10002	10002100	1
2005	3	宜蘭縣	三星鄉	F	0	50~54	10002	10002100	1
2005	3	宜蘭縣	五結鄉	M	0	70+	10002	10002090	1
2005	3	宜蘭縣	冬山鄉	F	0	20~24	10002	10002080	1
2005	3	宜蘭縣	冬山鄉	F	0	55~59	10002	10002080	1
2005	3	宜蘭縣	冬山鄉	F	0	70+	10002	10002080	1
2005	3	宜蘭縣	冬山鄉	M	0	70+	10002	10002080	2
2005	3	宜蘭縣	南澳鄉	M	0	45~49	10002	10002120	1
2005	3	宜蘭縣	員山鄉	M	0	70+	10002	10002070	2
2005	3	宜蘭縣	壯圍鄉	M	0	55~59	10002	10002060	1
2005	3	宜蘭縣	大同鄉	F	0	20~24	10002	10002110	1
2005	3	宜蘭縣	大同鄉	M	0	35~39	10002	10002110	1
2005	3	宜蘭縣	大同鄉	M	0	55~59	10002	10002110	1
2005	3	宜蘭縣	宜蘭市	M	0	30~34	10002	10002010	1
2005	3	宜蘭縣	宜蘭市	M	0	65~69	10002	10002010	1
2005	3	宜蘭縣	宜蘭市	M	0	70+	10002	10002010	1
2005	3	宜蘭縣	礁溪鄉	F	0	70+	10002	10002050	1
2005	3	宜蘭縣	羅東鎮	F	0	20~24	10002	10002020	1
2005	3	宜蘭縣	羅東鎮	M	0	55~59	10002	10002020	2
2005	3	宜蘭縣	羅東鎮	M	0	65~69	10002	10002020	1
2005	3	宜蘭縣	羅東鎮	F	0	70+	10002	10002020	1
2005	3	宜蘭縣	蘇澳鎮	M	0	15~19	10002	10002030	1
2005	3	宜蘭縣	蘇澳鎮	M	0	70+	10002	10002030	3
2005	3	宜蘭縣	頭城鎮	F	0	40~44	10002	10002040	1
2005	3	宜蘭縣	頭城鎮	M	0	65~69	10002	10002040	1
2005	3	新竹縣	五峰鄉	M	0	20~24	10004	10004130	1
2005	3	新竹縣	五峰鄉	F	0	25~29	10004	10004130	1
2005	3	新竹縣	五峰鄉	M	0	40~44	10004	10004130	1
2005	3	新竹縣	五峰鄉	M	0	50~54	10004	10004130	1
2005	3	新竹縣	尖石鄉	M	0	30~34	10004	10004120	2
2005	3	新竹縣	尖石鄉	M	0	40~44	10004	10004120	2
2005	3	新竹縣	尖石鄉	M	0	55~59	10004	10004120	1
2005	3	新竹縣	新豐鄉	F	0	30~34	10004	10004060	1
2005	3	新竹縣	湖口鄉	M	0	45~49	10004	10004050	1
2005	3	新竹縣	湖口鄉	F	0	70+	10004	10004050	1
2005	3	新竹縣	湖口鄉	M	0	70+	10004	10004050	2
2005	3	新竹縣	竹北市	M	0	45~49	10004	10004010	1
2005	3	新竹縣	竹北市	F	0	70+	10004	10004010	1
2005	3	新竹縣	竹東鎮	M	0	10~14	10004	10004020	1
2005	3	新竹縣	竹東鎮	F	0	60~64	10004	10004020	1
2005	3	新竹縣	竹東鎮	M	0	60~64	10004	10004020	1
2005	3	新竹縣	竹東鎮	F	0	70+	10004	10004020	3
2005	3	新竹縣	竹東鎮	M	0	70+	10004	10004020	1
2005	3	新竹縣	芎林鄉	F	0	70+	10004	10004070	1
2005	3	新竹縣	關西鎮	M	0	70+	10004	10004040	1
2005	3	苗栗縣	三灣鄉	M	0	70+	10005	10005160	2
2005	3	苗栗縣	後龍鎮	M	0	65~69	10005	10005060	2
2005	3	苗栗縣	後龍鎮	F	0	70+	10005	10005060	1
2005	3	苗栗縣	後龍鎮	M	0	70+	10005	10005060	1
2005	3	苗栗縣	泰安鄉	M	0	30~34	10005	10005180	1
2005	3	苗栗縣	苑裡鎮	M	0	70+	10005	10005020	3
2005	3	苗栗縣	苗栗市	F	0	45~49	10005	10005010	1
2005	3	苗栗縣	苗栗市	M	0	45~49	10005	10005010	1
2005	3	苗栗縣	苗栗市	M	0	70+	10005	10005010	2
2005	3	苗栗縣	西湖鄉	M	0	70+	10005	10005140	1
2005	3	苗栗縣	通霄鎮	F	0	65~69	10005	10005030	1
2005	3	苗栗縣	通霄鎮	M	0	65~69	10005	10005030	1
2005	3	苗栗縣	通霄鎮	F	0	70+	10005	10005030	1
2005	3	苗栗縣	銅鑼鄉	M	0	65~69	10005	10005100	1
2005	3	苗栗縣	頭份市	M	0	20~24	10005	10005050	1
2005	3	苗栗縣	頭份市	M	0	70+	10005	10005050	2
2005	3	苗栗縣	頭屋鄉	M	0	65~69	10005	10005120	1
2005	3	彰化縣	二林鎮	F	0	55~59	10007	10007200	1
2005	3	彰化縣	二林鎮	M	0	65~69	10007	10007200	1
2005	3	彰化縣	二林鎮	M	0	70+	10007	10007200	3
2005	3	彰化縣	二水鄉	M	0	70+	10007	10007180	1
2005	3	彰化縣	伸港鄉	M	0	70+	10007	10007050	1
2005	3	彰化縣	其他	M	0	70+	10007	10007999	2
2005	3	彰化縣	員林市	F	0	35~39	10007	10007100	1
2005	3	彰化縣	員林市	M	0	50~54	10007	10007100	1
2005	3	彰化縣	員林市	M	0	60~64	10007	10007100	1
2005	3	彰化縣	員林市	F	0	65~69	10007	10007100	1
2005	3	彰化縣	員林市	F	0	70+	10007	10007100	2
2005	3	彰化縣	員林市	M	0	70+	10007	10007100	3
2005	3	彰化縣	埔心鄉	F	0	45~49	10007	10007150	1
2005	3	彰化縣	埔心鄉	M	0	55~59	10007	10007150	1
2005	3	彰化縣	埔心鄉	M	0	60~64	10007	10007150	1
2005	3	彰化縣	埔心鄉	M	0	70+	10007	10007150	2
2005	3	彰化縣	埔鹽鄉	F	0	65~69	10007	10007140	1
2005	3	彰化縣	埔鹽鄉	M	0	70+	10007	10007140	2
2005	3	彰化縣	埤頭鄉	M	0	65~69	10007	10007220	1
2005	3	彰化縣	埤頭鄉	F	0	70+	10007	10007220	1
2005	3	彰化縣	埤頭鄉	M	0	70+	10007	10007220	2
2005	3	彰化縣	大城鄉	M	0	70+	10007	10007240	1
2005	3	彰化縣	大村鄉	F	0	70+	10007	10007130	1
2005	3	彰化縣	大村鄉	M	0	70+	10007	10007130	1
2005	3	彰化縣	彰化市	M	0	25~29	10007	10007010	1
2005	3	彰化縣	彰化市	M	0	35~39	10007	10007010	1
2005	3	彰化縣	彰化市	F	0	40~44	10007	10007010	1
2005	3	彰化縣	彰化市	M	0	40~44	10007	10007010	1
2005	3	彰化縣	彰化市	M	0	45~49	10007	10007010	1
2005	3	彰化縣	彰化市	M	0	50~54	10007	10007010	1
2005	3	彰化縣	彰化市	F	0	65~69	10007	10007010	1
2005	3	彰化縣	彰化市	M	0	65~69	10007	10007010	1
2005	3	彰化縣	彰化市	F	0	70+	10007	10007010	2
2005	3	彰化縣	彰化市	M	0	70+	10007	10007010	1
2005	3	彰化縣	永靖鄉	F	0	70+	10007	10007160	1
2005	3	彰化縣	溪州鄉	F	0	45~49	10007	10007260	1
2005	3	彰化縣	溪州鄉	M	0	65~69	10007	10007260	1
2005	3	彰化縣	溪州鄉	F	0	70+	10007	10007260	1
2005	3	彰化縣	溪州鄉	M	0	70+	10007	10007260	3
2005	3	彰化縣	溪湖鎮	M	0	20~24	10007	10007110	1
2005	3	彰化縣	溪湖鎮	M	0	25~29	10007	10007110	1
2005	3	彰化縣	溪湖鎮	F	0	40~44	10007	10007110	1
2005	3	彰化縣	溪湖鎮	M	0	70+	10007	10007110	1
2005	3	彰化縣	田中鎮	M	0	60~64	10007	10007120	1
2005	3	彰化縣	田中鎮	M	0	70+	10007	10007120	1
2005	3	彰化縣	社頭鄉	F	0	15~19	10007	10007170	1
2005	3	彰化縣	社頭鄉	M	0	55~59	10007	10007170	2
2005	3	彰化縣	社頭鄉	M	0	60~64	10007	10007170	1
2005	3	彰化縣	社頭鄉	F	0	65~69	10007	10007170	1
2005	3	彰化縣	社頭鄉	M	0	70+	10007	10007170	1
2005	3	彰化縣	秀水鄉	F	0	70+	10007	10007070	3
2005	3	彰化縣	秀水鄉	M	0	70+	10007	10007070	2
2005	3	彰化縣	竹塘鄉	M	0	60~64	10007	10007250	1
2005	3	彰化縣	芬園鄉	M	0	60~64	10007	10007090	2
2005	3	彰化縣	芬園鄉	F	0	70+	10007	10007090	2
2005	3	彰化縣	花壇鄉	M	0	45~49	10007	10007080	1
2005	3	彰化縣	花壇鄉	F	0	65~69	10007	10007080	1
2005	3	彰化縣	芳苑鄉	F	0	70+	10007	10007230	3
2005	3	彰化縣	芳苑鄉	M	0	70+	10007	10007230	2
2005	3	彰化縣	鹿港鎮	M	0	45~49	10007	10007020	2
2005	3	彰化縣	鹿港鎮	F	0	60~64	10007	10007020	1
2005	3	彰化縣	鹿港鎮	M	0	65~69	10007	10007020	1
2005	3	南投縣	中寮鄉	M	0	70+	10008	10008080	1
2005	3	南投縣	仁愛鄉	M	0	20~24	10008	10008130	1
2005	3	南投縣	仁愛鄉	M	0	25~29	10008	10008130	2
2005	3	南投縣	仁愛鄉	F	0	30~34	10008	10008130	1
2005	3	南投縣	仁愛鄉	M	0	30~34	10008	10008130	1
2005	3	南投縣	仁愛鄉	F	0	35~39	10008	10008130	1
2005	3	南投縣	仁愛鄉	M	0	35~39	10008	10008130	2
2005	3	南投縣	仁愛鄉	M	0	45~49	10008	10008130	1
2005	3	南投縣	仁愛鄉	F	0	55~59	10008	10008130	1
2005	3	南投縣	仁愛鄉	F	0	70+	10008	10008130	3
2005	3	南投縣	仁愛鄉	M	0	70+	10008	10008130	1
2005	3	南投縣	信義鄉	M	0	20~24	10008	10008120	1
2005	3	南投縣	信義鄉	M	0	25~29	10008	10008120	1
2005	3	南投縣	信義鄉	F	0	45~49	10008	10008120	1
2005	3	南投縣	信義鄉	M	0	65~69	10008	10008120	1
2005	3	南投縣	南投市	F	0	15~19	10008	10008010	1
2005	3	南投縣	南投市	M	0	25~29	10008	10008010	1
2005	3	南投縣	南投市	M	0	50~54	10008	10008010	1
2005	3	南投縣	南投市	M	0	55~59	10008	10008010	1
2005	3	南投縣	南投市	M	0	65~69	10008	10008010	1
2005	3	南投縣	南投市	F	0	70+	10008	10008010	1
2005	3	南投縣	南投市	M	0	70+	10008	10008010	2
2005	3	南投縣	名間鄉	M	0	55~59	10008	10008060	1
2005	3	南投縣	名間鄉	M	0	70+	10008	10008060	2
2005	3	南投縣	國姓鄉	F	0	65~69	10008	10008100	1
2005	3	南投縣	埔里鎮	F	0	15~19	10008	10008020	1
2005	3	南投縣	埔里鎮	F	0	45~49	10008	10008020	1
2005	3	南投縣	埔里鎮	M	0	50~54	10008	10008020	1
2005	3	南投縣	埔里鎮	M	0	70+	10008	10008020	2
2005	3	南投縣	水里鄉	M	0	25~29	10008	10008110	1
2005	3	南投縣	水里鄉	M	0	70+	10008	10008110	1
2005	3	南投縣	竹山鎮	M	0	65~69	10008	10008040	1
2005	3	南投縣	竹山鎮	M	0	70+	10008	10008040	3
2005	3	南投縣	草屯鎮	M	0	30~34	10008	10008030	1
2005	3	南投縣	草屯鎮	F	0	35~39	10008	10008030	1
2005	3	南投縣	草屯鎮	M	0	40~44	10008	10008030	1
2005	3	南投縣	草屯鎮	F	0	65~69	10008	10008030	2
2005	3	南投縣	草屯鎮	F	0	70+	10008	10008030	1
2005	3	南投縣	草屯鎮	M	0	70+	10008	10008030	1
2005	3	南投縣	魚池鄉	M	0	30~34	10008	10008090	1
2005	3	雲林縣	二崙鄉	F	0	70+	10009	10009110	1
2005	3	雲林縣	二崙鄉	M	0	70+	10009	10009110	1
2005	3	雲林縣	元長鄉	F	0	50~54	10009	10009170	1
2005	3	雲林縣	元長鄉	F	0	70+	10009	10009170	1
2005	3	雲林縣	元長鄉	M	0	70+	10009	10009170	1
2005	3	雲林縣	北港鎮	M	0	40~44	10009	10009060	1
2005	3	雲林縣	北港鎮	M	0	45~49	10009	10009060	1
2005	3	雲林縣	北港鎮	F	0	70+	10009	10009060	1
2005	3	雲林縣	北港鎮	M	0	70+	10009	10009060	1
2005	3	雲林縣	口湖鄉	M	0	70+	10009	10009190	1
2005	3	雲林縣	古坑鄉	M	0	40~44	10009	10009070	1
2005	3	雲林縣	古坑鄉	M	0	60~64	10009	10009070	1
2005	3	雲林縣	古坑鄉	M	0	70+	10009	10009070	1
2005	3	雲林縣	台西鄉	F	0	55~59	10009	10009160	1
2005	3	雲林縣	台西鄉	M	0	60~64	10009	10009160	1
2005	3	雲林縣	台西鄉	F	0	70+	10009	10009160	1
2005	3	雲林縣	土庫鎮	M	0	45~49	10009	10009050	1
2005	3	雲林縣	土庫鎮	M	0	65~69	10009	10009050	1
2005	3	雲林縣	土庫鎮	M	0	70+	10009	10009050	1
2005	3	雲林縣	大埤鄉	M	0	60~64	10009	10009080	1
2005	3	雲林縣	崙背鄉	M	0	60~64	10009	10009120	1
2005	3	雲林縣	斗六市	M	0	40~44	10009	10009010	1
2005	3	雲林縣	斗六市	M	0	60~64	10009	10009010	1
2005	3	雲林縣	斗六市	M	0	70+	10009	10009010	2
2005	3	雲林縣	斗南鎮	M	0	70+	10009	10009020	1
2005	3	雲林縣	東勢鄉	F	0	60~64	10009	10009140	1
2005	3	雲林縣	東勢鄉	M	0	70+	10009	10009140	2
2005	3	雲林縣	林內鄉	F	0	45~49	10009	10009100	1
2005	3	雲林縣	林內鄉	M	0	55~59	10009	10009100	1
2005	3	雲林縣	林內鄉	M	0	70+	10009	10009100	1
2005	3	雲林縣	水林鄉	M	0	65~69	10009	10009200	1
2005	3	雲林縣	水林鄉	M	0	70+	10009	10009200	3
2005	3	雲林縣	莿桐鄉	F	0	40~44	10009	10009090	1
2005	3	雲林縣	莿桐鄉	M	0	45~49	10009	10009090	1
2005	3	雲林縣	莿桐鄉	M	0	55~59	10009	10009090	2
2005	3	雲林縣	莿桐鄉	M	0	60~64	10009	10009090	2
[truncated: 165,890 more rows]
